# Cortical Representations of Concrete and Abstract Concepts in Language Combine Visual and Linguistic Representations

Jerry Tang<sup>1</sup>, Amanda LeBel<sup>2</sup>, Alexander G. Huth<sup>1,2</sup>

<sup>1</sup> Department of Computer Science, The University of Texas at Austin, Austin, TX 78712, USA

<sup>2</sup> Department of Neuroscience, The University of Texas at Austin, Austin, TX 78712, USA

Correspondence should be addressed to:

Alexander G. Huth  
100 E. 24th St., NHB 2.504  
The University of Texas at Austin  
Austin, TX 78712  
E-mail: <[huth@cs.utexas.edu](mailto:huth@cs.utexas.edu)>

Running Title: *Visually grounded models of language processing*

Manuscript Summary:

Pages: 34  
Abstract Words: 168  
Words: 13508 (including figure legends)  
Figures: 5  
Supplementary Figures: 2  
References: 55

This work was supported by the Whitehall Foundation, Alfred P. Sloan Foundation, Burroughs-Wellcome Fund, and the Texas Advanced Computing Center (TACC). The authors declare no conflict of interest.

### Abstract

30  
31 The human semantic system stores knowledge acquired through both perception and language.  
32 To study how semantic representations in cortex integrate perceptual and linguistic information,  
33 we created semantic word embedding spaces that combine models of visual and linguistic  
34 processing. We then used these visually-grounded semantic spaces to fit voxelwise encoding  
35 models to fMRI data collected while subjects listened to hours of narrative stories. We found  
36 that cortical regions near the visual system represent concepts by combining visual and  
37 linguistic information, while regions near the language system represent concepts using mostly  
38 linguistic information. Assessing individual representations near visual cortex, we found that  
39 more concrete concepts contain more visual information, while even abstract concepts contain  
40 some amount of visual information from associated concrete concepts. Finally we found that  
41 these visual grounding effects are localized near visual cortex, suggesting that semantic  
42 representations specifically reflect the modality of adjacent perceptual systems. Our results  
43 provide a computational account of how visual and linguistic information are combined to  
44 represent concrete and abstract concepts across cortex.

45  
46 **Keywords:** fMRI, semantic, language, visual, grounding

## Introduction

Humans learn about the world through both perception and language. The acquired knowledge is stored in cerebral cortex as semantic concept representations, which support a range of cognitive processes including language understanding. Many previous fMRI studies have found that concepts are represented near the perceptual systems through which they are commonly experienced (Binder and Desai, 2011; Harpaintner et al., 2020; Martin, 2016). These studies support grounded cognition theories, which hold that a concept's semantic representation is formed through generalization or re-enactment of perceptual representations involved in learning the concept (Barsalou, 2008; Binder and Desai, 2011). Other studies have found that BOLD responses to words (Mitchell et al., 2008) and narratives (Huth et al., 2016; Wehbe et al., 2014) can be predicted using distributional word embeddings, which capture word co-occurrence statistics in language data. Distributional word embeddings lack explicit connections to the physical world (Bruni et al., 2014; Harnad, 1990), so their success in modeling brain responses demonstrates that semantic representations reflect word associations that can be learned from language alone. Together these findings suggest that semantic representations contain both perceptual and linguistic information (Andrews et al., 2014). However, little is known about how these different sources of information are combined to form semantic representations in each cortical region.

One open question is whether different cortical regions represent concepts using different amounts of perceptual and linguistic information. Grounded cognition theories predict that representations in each semantically selective cortical region reflect how information is represented in adjacent perceptual systems (Barsalou, 2008; Binder and Desai, 2011). For instance, these theories predict that cortical regions near the visual system represent concepts using visual information. We might similarly expect cortical regions near the language system to represent concepts using information about language usage, such as distributional word co-occurrence. However, there is little work directly assessing these theories by comparing semantic representations in each cortical region to computational models of perceptual and linguistic processing (Anderson et al., 2019). A second open question is whether concrete and abstract concepts are represented using different amounts of perceptual and linguistic information. Previous studies (Binder et al., 2005; Paivio, 1991) suggest that concrete concepts—which are directly experienced through perception—contain more perceptual information, but this relationship has not been directly tested using fMRI. Furthermore, the role of perceptual information in representing abstract concepts—which are not directly experienced through perception—is under debate. Traditional views hold that abstract concepts are represented solely by linguistic information (Dove, 2009; Paivio, 1991), while recent studies suggest that abstract concepts contain some amount of perceptual information (Harpaintner et al., 2018). A third open question is how the semantic system represents concepts experienced through multiple perceptual modalities. Grounded cognition theories predict that concepts are represented near each perceptual system through which they are experienced, in a format that specifically reflects that perceptual modality (Barsalou, 2008; Martin, 2016). For instance, visual features of "hammer" might be represented near visual cortex, while tactile features of "hammer" might be represented near somatosensory cortex. Alternatively, concepts could be

91 represented across cortex in a format that integrates information from multiple different  
92 perceptual modalities. For instance, each cortical region selective for "hammer" might  
93 simultaneously represent its visual, tactile and auditory features.

94  
95 Here, we investigated these questions by constructing a computational model of how *visual* and  
96 *linguistic* information combine to form semantic representations. We first modeled visual and  
97 linguistic representations as separate word embedding spaces. Embedding spaces represent  
98 each word using a high-dimensional vector, and quantify the similarity between each pair of  
99 words using the dot product between their corresponding vectors. Since our subjects have  
100 learned about concepts through both vision and language, we next modeled each word's  
101 semantic representation by concatenating its visual and linguistic embeddings, making the  
102 semantic similarity between each pair of words a combination of their visual and linguistic  
103 similarities. Because the relative amount of visual and linguistic information may differ across  
104 brain regions or concepts, we weighted the visual and linguistic embeddings for each word prior  
105 to concatenation. By varying the weights on the visual and linguistic embeddings, we were able  
106 to construct a spectrum of semantic spaces that can capture different possibilities for how each  
107 word's semantic representation combines its visual and linguistic representations.

108  
109 We compared the different semantic embedding spaces to concept representations in each  
110 cortical region using a natural language fMRI experiment. In this experiment, BOLD fMRI  
111 responses were collected from seven human subjects as they listened to over five hours of  
112 narrative stories from *The Moth Radio Hour* (**Figure 1A**). These stories activate the semantic  
113 representations of thousands of concepts common in daily life. We then fit voxelwise encoding  
114 models that separately predict the fMRI data in each subject from the stimulus words (Huth et  
115 al., 2016; Jain and Huth, 2018; Wehbe et al., 2014). An encoding model uses regularized linear  
116 regression to estimate a set of weights for each voxel that predict how each word influences  
117 BOLD responses in that voxel. Encoding models were fit using an embedding space prior,  
118 which enforces that similar words in the embedding space should have similar encoding weights  
119 (Nunez-Elizalde et al., 2019). Since successful models of the brain should be able to generalize  
120 to new natural stimuli (Hamilton and Huth, 2018), encoding models were evaluated by predicting  
121 BOLD responses to stories that were not used for model estimation, and then computing the  
122 correlation between predicted and actual responses (**Figure 1B**).

123  
124 To quantify how much visual or linguistic information is represented in each cortical region, we  
125 fit separate voxelwise encoding models using embedding spaces that range from fully linguistic  
126 to fully visual. In voxelwise modelling, the embedding space that best reflects a voxel's semantic  
127 representations will yield the best generalization performance. We thus operationalized the  
128 *representational format* of each voxel as the semantic embedding space with the best  
129 generalization performance.

Tang et al. Visually grounded models of language processing

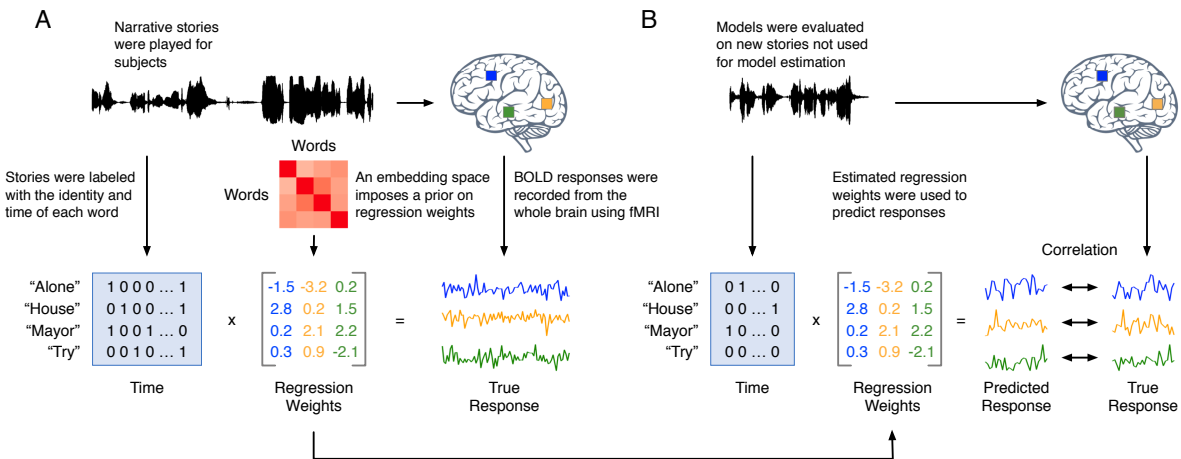

130  
131  
132  
133  
134  
135  
136  
137

**Figure 1. Natural language fMRI experiment.** (A) Seven human subjects listened to over 5 hours of narrative stories while BOLD responses were measured using fMRI. A stimulus matrix was constructed by identifying the words spoken at each point in time in the stories. A regularized, linearized finite impulse response regression model was then estimated for each cortical voxel using a word embedding space prior. The estimated encoding model weights describe how words in the stories influence BOLD signals in each cortical voxel. The prior enforces that similar words in the embedding space should have similar encoding model weights. (B) Models were tested on stories that were not included in the model estimation procedure. Generalization performance for a test story was computed as the linear correlation between the predicted BOLD responses to the test story and the observed BOLD responses.

## Results

### **Construction of visual, linguistic, and semantic embedding spaces.**

In order to assess the amount of visual and linguistic information that is incorporated into semantic representations, we first needed to construct computational models of visual and linguistic processing. We did that here using separate visual and linguistic word embedding spaces, which are then combined in different ratios to create semantic embedding spaces.

We modeled linguistic representations using distributional word embeddings, which assign each word a vector based on its co-occurrence statistics with a set of target words across a large corpus. Such embeddings have been shown to capture meaningful linguistic associations (Deerwester et al., 1990; Lund and Burgess, 1996), and are widely used as computational models of lexical semantics (Pennington et al., 2014). Here, we used a distributional embedding space previously shown to model BOLD responses to narrative stories (de Heer et al., 2017; Deniz et al., 2019; Huth et al., 2016). While co-occurrence statistics may implicitly capture some degree of perceptual similarity (Riordan and Jones, 2011), they do not incorporate explicit information about the physical world (Glenberg and Robertson, 2000; Harnad, 1990), making them an appropriate model of knowledge acquired through language. Words that occur in similar linguistic contexts will have similar linguistic embeddings, and will thus be considered linguistically similar.

We modeled visual representations using image embeddings extracted from convolutional neural networks (CNNs). We first defined a diverse pool of *visual words*, which refer to entities or events that can be experienced through vision (see **Methods** for details). For each visual word, we sampled 100 related natural images from ImageNet (Deng et al., 2009). Recent studies (Cadieu et al., 2014; Eickenberg et al., 2017; Güçlü and van Gerven, 2015; Khaligh-Razavi and Kriegeskorte, 2014; Yamins et al., 2014) have shown that primate visual processing is well-modeled by CNNs trained to identify objects in images (Chatfield et al., 2014; Krizhevsky et al., 2012; Sermanet et al., 2013; Zeiler and Fergus, 2014). We used a similar CNN (VGG16; Simonyan and Zisserman, 2015) to extract embedding vectors for each image. The visual embedding for each visual word was then obtained by averaging the extracted CNN embeddings across the 100 sampled images. Words with referents that evoke similar responses in visual cortex will have similar visual embeddings, and will thus be considered visually similar.

We next estimated visual embeddings for *non-visual words*. While non-visual words refer to concepts that cannot be directly experienced through vision, recent studies suggest that their representations may nonetheless contain some amount of visual information (Harpaintner et al., 2018). To capture this, we developed a *perceptual propagation* method that represents non-visual words by combining the visual embeddings of linguistically associated visual words (similar to Collell et al., 2017). For each non-visual word  $w$ , we fit a linear regression  $\theta_w$  to reconstruct its linguistic embedding as a weighted sum of the linguistic embeddings of visual words. Visual words that are linguistically associated with  $w$  will have high weights in  $\theta_w$ . We then predicted a visual embedding for  $w$  by applying the same linear weights  $\theta_w$  to the visual

182 embeddings of the visual words. Non-visual words will thus be considered visually similar if they  
183 are linguistically associated with visually similar words. For instance, the non-visual words  
184 “famous” and “lonely” are dissimilar in the linguistic embedding space but similar in the visual  
185 embedding space, as they are respectively associated with the visually similar words “musician”  
186 and “friend”. **Figure 2A** summarizes the process of creating visual and linguistic embedding  
187 spaces.

188  
189 Before using the visual and linguistic embedding spaces to model semantic representations in  
190 the brain, we first tested whether they capture different notions of similarity. We did this by  
191 defining semantic categories consisting of *people*, *clothing*, and *place* words and then  
192 identifying qualitative differences in how these categories are represented across embedding  
193 spaces (**Figure 2B**). We visualized each embedding space by using principal components  
194 analysis (PCA) to project the embedding of each visual word onto two dimensions. PCA projects  
195 words with similar embeddings to nearby points in 2D space, and those with very different  
196 embeddings to distant points. First, we found that both embedding spaces contain distinct  
197 *people*, *clothing*, and *place* clusters, reflecting previous findings that visual and linguistic  
198 embedding spaces structure concepts into similar categories (Riordan and Jones, 2011).  
199 However, we found that relationships within each category differed between the visual and  
200 linguistic embedding spaces. For instance, *people* words (such as “doctor”, “athlete”, and  
201 “friend”) are close together in the visual space, reflecting their shared visual features, and far  
202 apart in the linguistic space, reflecting their diverse linguistic contexts. In contrast, *clothing*  
203 words (such as “jacket”, “shoe”, and “hat”) are far apart in the visual embedding space,  
204 reflecting their diverse visual features, and close together in the linguistic embedding space,  
205 reflecting their shared linguistic contexts. This qualitative analysis suggests that the visual and  
206 linguistic embedding spaces structure concepts into similar high-level categories, but capture  
207 fine-grained notions of visual and linguistic similarity within each category.

208  
209 While the previous analysis shows that visual and linguistic embedding spaces differ within  
210 visual categories like *people* and *clothing*, it is unclear whether they also differ for more abstract  
211 words. Our perceptual propagation method predicts that non-visual words (which tend to be  
212 more abstract) acquire visual information through associations with visual words. However, for  
213 highly abstract words that are not strongly associated with any visual words, the estimated  
214 visual embeddings may not contain any meaningful visual information. In that case, we might  
215 expect no difference between the visual and linguistic embedding spaces. To test this  
216 possibility, we quantified the difference between visual and linguistic model representations for  
217 each individual word. We did this by constructing visual and linguistic *similarity vectors* for each  
218 word that contain its visual and linguistic similarity with every other word. We then computed a  
219 *modality alignment score* for each word as the linear correlation between its visual and linguistic  
220 similarity vectors. We plotted each word’s modality alignment score against a *concreteness*  
221 *score* derived from a separate dataset of behavioral judgments about word concreteness  
222 (Brysbaert et al., 2014; see **Methods**). We found that modality alignment scores are  
223 anticorrelated with concreteness scores ( $r = -0.26$ ), suggesting that the visual and linguistic  
224 embedding spaces differ more for concrete words than for abstract words. Nonetheless, we  
225 found that the visual and linguistic embedding spaces differ to some degree even for highly

226 abstract words, suggesting that the visual embedding space represents abstract words using  
227 some visual information that is absent from the linguistic embedding space (**Figure 2C**).

228  
229 Finally, we combined the visual and linguistic embedding spaces into semantic embedding  
230 spaces to model how concepts are represented in the brain's semantic system. Since our  
231 subjects have learned about the world through both vision and language, we expect each  
232 word's semantic representation to combine the two information sources. Semantic embedding  
233 spaces formalize this hypothesis by representing each word as a concatenation of its visual and  
234 linguistic embeddings. Since different words may contain different amounts of visual and  
235 linguistic information, each word  $w$  is assigned a *modality weight*  $\alpha_w$  such that its visual  
236 embedding is weighted by  $\alpha_w$  and its linguistic embedding is weighted by  $(1 - \alpha_w)$  prior to  
237 concatenation. The semantic similarity between each pair of words is thus modeled as a  
238 combination of their visual and linguistic similarities, weighted by the modality weights of both  
239 words (see **Methods**). Under this model, each semantic embedding space is generated by a  
240 vector  $\alpha$  of modality weights across the words, and captures a different possibility for how visual  
241 and linguistic information are combined to represent each word. For example, setting  $\alpha = 1$  for  
242 all words would capture the hypothesis that all concepts are represented in a visual format,  
243 while setting  $\alpha = 1$  for concrete words and  $\alpha = 0$  for abstract words would capture the hypothesis  
244 that only concrete concepts are represented in a visual format.

245  
246 The space of  $\alpha$  vectors—and thus the number of possible semantic embedding spaces—is  
247 infinitely large. To constrain this space, we only considered modality weights that are  
248 monotonically increasing functions  $\alpha_{\text{concrete}}$  (see **Methods**) of concreteness score  $c$ . This  
249 hypothesis reflects previous findings that more concrete words appear to contain more  
250 perceptual information (Harpaintner et al. 2018, Anderson et al. 2019). The  $\alpha_{\text{concrete}}$  model has a  
251 single parameter  $b$  that biases the degree to which each word is represented by visual  
252 information (**Figure 2D**). When  $b$  is small,  $\alpha_{\text{concrete}}(c)$  approaches 0 for all values of  $c$ , causing all  
253 words to be represented solely by their linguistic embeddings. As  $b$  increases, more concrete  
254 words are represented by more visual information. When  $b$  is large,  $\alpha_{\text{concrete}}(c)$  approaches 1 for  
255 all values of  $c$ , causing all words to be represented solely by their visual embeddings. We tested  
256 a range of  $b$  values (-10, -1, 0, 1, 10) that induce semantic embedding spaces ranging from *fully*  
257 *linguistic* ( $b = -10$ ) to *fully visual* ( $b = 10$ ). We considered all embedding spaces containing some  
258 amount of visual information ( $b = -1, 0, 1, 10$ ) to be *visually grounded*. This semantic embedding  
259 spectrum captures a diverse set of hypotheses for how visual and linguistic information are  
260 combined in each word's semantic representation (**Figure 2E**).



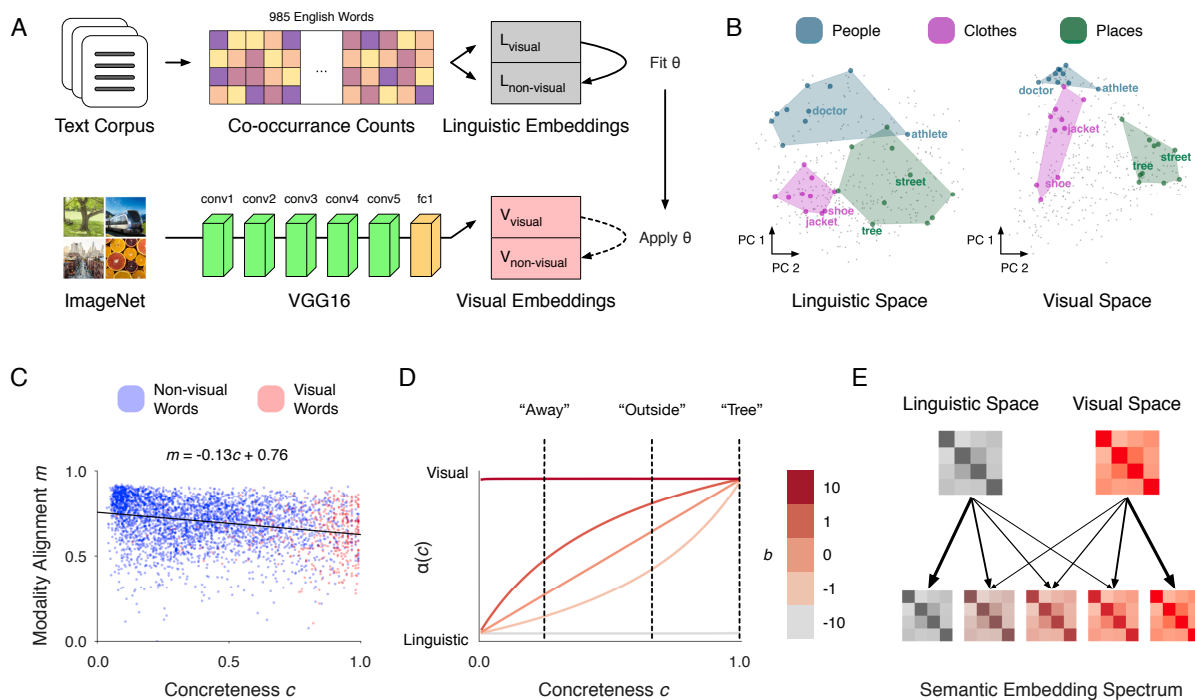

261  
 262 **Figure 2. Construction of visual, linguistic, and semantic embedding spaces.** (A) Linguistic embedding vectors were  
 263 constructed from distributional co-occurrence statistics in a large external corpus. Visual embedding vectors for visual words were  
 264 constructed by sampling 100 images from ImageNet for each word and averaging embeddings extracted from a VGG16  
 265 convolutional neural network. Visual embedding vectors for non-visual words were constructed using a perceptual propagation  
 266 method  $\theta$  that represents each non-visual word as a linear combination of the visual embeddings of associated visual words (see  
 267 **Methods** for details). (B) The visual and linguistic embedding spaces were visualized by projecting the embedding of each visual  
 268 word onto the first two principal components of the embedding space. The visual and linguistic embedding spaces structure words  
 269 into similar high-level *people*, *clothing*, and *place* categories. However, fine-grained similarities within each category differ across  
 270 embedding spaces. Words with visually similar referents (e.g. *people*) are more similar in the visual space, while words that occur in  
 271 similar linguistic contexts (e.g. *clothes*) are more similar in the linguistic space. (C) For each word, a *modality alignment score*—  
 272 computed as the linear correlation between its visual similarities and linguistic similarities with other words—was plotted against a  
 273 *concreteness score* derived from behavioral judgments. Visual words were colored red, and non-visual words blue. Modality  
 274 alignment scores are weakly anticorrelated with concreteness scores, suggesting that visual and linguistic embedding spaces differ  
 275 more for concrete words than for abstract words. Nonetheless, visual and linguistic similarity differ to some degree even for highly  
 276 abstract words, demonstrating that the visual embedding space represents abstract words using visual information absent from the  
 277 linguistic embedding space. (D) Semantic embedding spaces were constructed by concatenating visual and linguistic embeddings  
 278 for each word. Prior to concatenation, the visual and linguistic embeddings were weighted by a function  $\alpha_{\text{concrete}}$  of each word's  
 279 concreteness score, and the total amount of visual information for each word was controlled by a parameter  $b$ . Varying  $b$  creates a  
 280 semantic embedding spectrum that interpolates between the linguistic embedding space and the visual embedding space.  
 281 Intermediate spaces in the semantic embedding spectrum represent each word as a combination of visual and linguistic information.

282

283 **Representational format of cortical regions near visual and language systems.**

284

285 We first compared semantic embedding spaces to characterize the representational format of  
 286 each semantically selective cortical region. Grounded cognition theories (Barsalou, 2008; Binder  
 287 and Desai, 2011) predict that cortical regions near the visual system respond similarly to visually  
 288 similar words, and should thus be best modeled by visually grounded embedding spaces.  
 289 Conversely, we predict that cortical regions near the language system respond similarly to  
 290 linguistically similar words, and should thus be best modeled by the fully linguistic embedding  
 291 space. Previous studies have tested whether cortical regions are better modeled by an

292 experiential embedding space, a linguistic embedding space, or a multimodal embedding space  
293 that combines the two information sources (Anderson et al., 2019). However, this experiential  
294 embedding space reflects coarse-grained behavioral ratings of whether concepts are  
295 experienced through similar perceptual modalities (such as whether each concept “has a  
296 characteristic or defining color”), rather than fine-grained similarity within a specific perceptual  
297 modality. Furthermore, multimodal embeddings were modeled in (Anderson et al., 2019) as  
298 unweighted concatenations of perceptual and linguistic embeddings, which implicitly assumes  
299 that each concept is represented by the same amount of perceptual and linguistic information.  
300 Our semantic embedding spectrum differs from these previous models in two important ways:  
301 CNN embeddings explicitly reflect fine-grained visual similarity (Eickenberg et al., 2017), and  
302 different semantic embedding spaces model different hypotheses for how each concept’s  
303 semantic representation combines visual and linguistic information.

304  
305 For each subject, we fit voxelwise encoding models using each space in the semantic  
306 embedding spectrum, and then tested the generalization performance of each model on held-  
307 out data. We identified *semantic system voxels* that were significantly predicted under any  
308 space in the embedding spectrum ( $q(\text{FDR}) < 0.05$ , blockwise permutation test; see **Methods**).  
309 Our encoding models significantly predicted up to 18 percent of cortical voxels in each subject.  
310 These semantic system voxels were located in broad regions of prefrontal cortex, temporal  
311 cortex, and parietal cortex (see **Figure S1** for encoding model performance across cortex) that  
312 align with semantically selective regions reported in previous studies (Binder et al., 2009; Huth  
313 et al., 2016).

314  
315 To compare the different semantic spaces, we aggregated model performance across semantic  
316 system voxels near known vision and language regions of interest (ROIs), which were identified  
317 in each subject using separate localizer data (see **Methods** for details). For vision ROIs we  
318 defined the fusiform face area (FFA), parahippocampal place area (PPA), occipital place area  
319 (OPA), retrosplenial cortex (RSC), and extrastriate body area (EBA). For language ROIs we  
320 defined the auditory cortex (AC), Broca’s area, and superior premotor ventral speech area  
321 (sPMv). The performance of each embedding space around each ROI was first summarized by  
322 averaging encoding model generalization performance across all semantic system voxels within  
323 15mm of the ROI along the cortical surface. We then defined the *visual grounding score* for  
324 each visually grounded space around an ROI as the difference between its encoding  
325 performance and that of the fully linguistic space (**Figure 3**). If any visually grounded spaces  
326 have a positive visual grounding score around an ROI, it would suggest that semantically  
327 selective cortical regions near the ROI tend to represent concepts using some amount of visual  
328 information. If all visually grounded spaces have a negative visual grounding score, it would  
329 suggest that semantically selective cortical regions near the ROI tend to represent concepts  
330 using mostly linguistic information.

331  
332 We used a linear mixed-effects model to compare visual grounding score for each visually  
333 grounded space (4 levels) across ROI type (2 levels: vision, language) with ROI identity as a  
334 random effect nested in subject identity. This test showed that visual grounding score varies  
335 significantly across embedding spaces (Wald  $\chi^2$  test,  $p < 10^{-4}$ ) and ROI type ( $p < 10^{-4}$ ). There

336 was also a significant interaction between embedding space and ROI type ( $p = 0.012$ ),  
337 demonstrating that semantic embedding spaces have different patterns of generalization  
338 performance across vision and language ROIs. A post hoc test comparing the visual grounding  
339 score of each visually grounded space against the null hypothesis of zero found that multiple  
340 visually grounded spaces ( $b = -1, 0$ ) significantly outperformed the fully linguistic space around  
341 vision ROIs ( $q(\text{FDR}) < 0.05$ ), while no visually grounded spaces significantly outperformed the  
342 fully linguistic space around language ROIs. A post hoc test comparing visual grounding score  
343 around vision and language ROIs found that every visually grounded space had a significantly  
344 higher visual grounding score around vision ROIs than around language ROIs ( $q(\text{FDR}) < 0.05$ ).

345  
346 **Figure 3** shows these differences between the semantic embedding spaces around visual and  
347 language ROIs. The small size of these effects is likely a consequence of our encoding  
348 framework and the large amount of fMRI data (5 hours per participant) that was used. In a  
349 regularized encoding model, different embedding spaces impose different priors on the model  
350 weights (Nunez-Elizalde et al., 2019), but as the amount of training data increases, the model  
351 can learn accurate weights from the data alone. Comparing embedding spaces by fitting  
352 encoding models on large fMRI datasets thus reveals small but significant differences in  
353 performance.

354  
355 Our results provide fMRI evidence that cortical regions near the visual system represent  
356 concepts using both visual and linguistic information, while cortical regions near the language  
357 system represent concepts using mostly linguistic information (Barsalou, 2008; Binder and  
358 Desai, 2011). These results are markedly different from previous fMRI studies, which found that  
359 multimodal embedding spaces outperform linguistic embedding spaces in superior temporal and  
360 inferior frontal regions, but not in cortical regions near the visual system (Anderson et al., 2019).  
361 The success of our visually grounded embedding spaces in these latter regions suggests that  
362 semantic representations near the visual system specifically reflect fine-grained visual  
363 information, which is captured in our CNN embeddings but not in previous experiential  
364 embeddings.

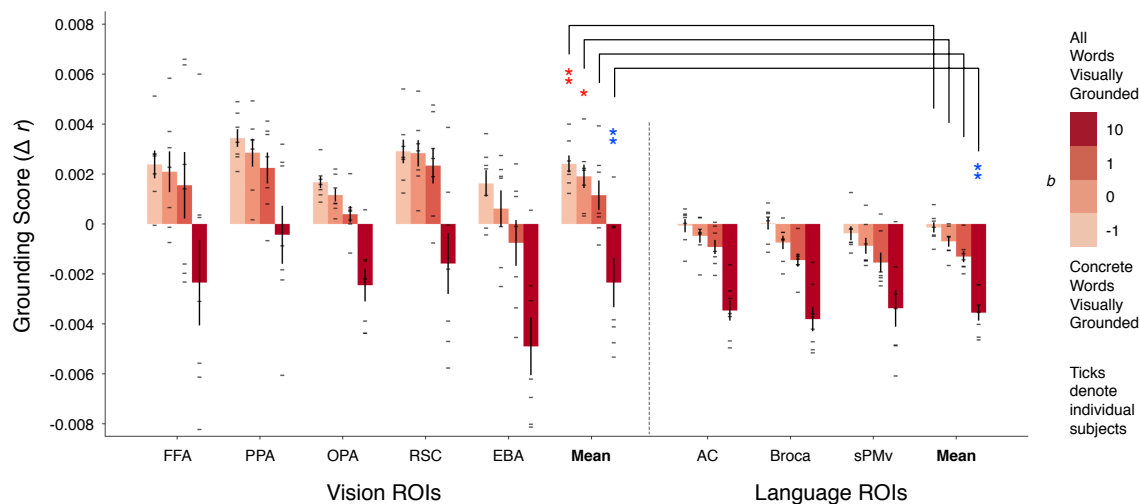

365 **Figure 3. Representational format of cortical regions near visual and language systems.** Encoding models were fit using each  
366

367 space in a semantic embedding spectrum ranging from fully linguistic to fully visual. Vision- and language-related functional regions  
368 of interest (ROIs) were identified for each subject using separate localizer data. Embedding space performance around an ROI was  
369 quantified by averaging encoding model generalization performance (linear correlation  $r$ ) across all significantly-predicted voxels  
370 within 15 mm of the ROI along the cortical surface. For each visually grounded embedding space, *visual grounding score*—defined  
371 as the performance improvement over the fully linguistic embedding space—was averaged across subjects and plotted for each ROI  
372 and ROI type (vision and language). Ticks denote visual grounding scores for individual subjects. Error bars indicate the standard  
373 error of the mean across subjects ( $n = 7$ ). We used a linear mixed-effects model to compare visual grounding score around vision  
374 and language ROIs for each visually grounded embedding space. Significance was tested for each ROI type (vision, language); red  
375 asterisks indicate that a visually grounded space performs significantly better than the fully linguistic space, and blue asterisks  
376 indicate that a visually grounded space performs significantly worse (\*,  $q(\text{FDR}) < 0.05$ ; \*\*,  $q(\text{FDR}) < 10^{-2}$ ; \*\*\*,  $q(\text{FDR}) < 10^{-3}$ ; \*\*\*\*,  
377  $q(\text{FDR}) < 10^{-4}$ ). Brackets signify that the visual grounding score of each visually grounded space is significantly higher around vision  
378 ROIs than around language ROIs ( $q(\text{FDR}) < 0.05$ ). These results show that visually grounded embedding spaces significantly  
379 outperform the fully linguistic embedding space near vision ROIs, but not language ROIs.

380

### 381 **Visual grounding of concrete and abstract concepts near visual cortex.**

382

383 The previous analyses show that concept representations in regions near visual cortex are  
384 better modeled by visually grounded embedding spaces that combine visual and linguistic  
385 information ( $b = -1, 0, 1$ ) than by embedding spaces that solely reflect linguistic ( $b = -10$ ) or  
386 visual ( $b = 10$ ) information. In these intermediate visually grounded embedding spaces, the  
387 relative weighting of each word's visual and linguistic embeddings was selected to be a function  
388  $\alpha_{\text{concrete}}$  of the word's concreteness score. The  $\alpha_{\text{concrete}}$  model captures two major hypotheses for  
389 how semantic representations combine visual and linguistic information. First,  $\alpha_{\text{concrete}}$  is a  
390 monotonically increasing function of concreteness. This models the hypothesis that more  
391 concrete concepts are represented by more visual information while more abstract concepts are  
392 represented by more linguistic information (Paivio, 1991). Second, the visually grounded  
393 parameterizations of  $\alpha_{\text{concrete}}$  ( $b = -1, 0, 1, 10$ ) assign a positive weight to every word, meaning  
394 that even abstract words are represented to some extent by their estimated visual embeddings.  
395 This models the hypothesis that abstract concepts are represented using some amount of  
396 perceptual information from linguistically associated concrete concepts. In the following  
397 analyses we focused on semantically selective regions near visual cortex, and directly tested  
398 these two hypotheses by comparing the  $\alpha_{\text{concrete}}$  model against alternative modality weight  
399 models.

400

401 To quantify how well a modality weight model explains semantic representations near visual  
402 cortex, we fit an encoding model using the semantic embedding space that it generates. We  
403 then averaged encoding model performance (linear correlation  $r$ ) across semantic system  
404 voxels within 15mm of vision ROIs. Before comparing against alternative modality weight  
405 models, we selected the best visually grounded  $\alpha_{\text{concrete}}$  model across the tested voxels ( $b = -1$ )  
406 using separate validation data (see **Methods**).

407

408 Previous theories have proposed that concrete concept representations contain more  
409 perceptual information, while abstract concept representations contain more linguistic  
410 information (Paivio, 1991). However, this hypothesis has not been directly tested at the level of  
411 individual words using fMRI. Here, we conducted a permutation test to quantify whether the  
412 concreteness of each concept explains the amount of visual and linguistic information in that  
413 concept's representation. We conducted 1,000 trials in which we permuted concreteness scores  
414 across words before computing modality weights under the  $\alpha_{\text{concrete}}$  model. Each trial  $t$  produced

415 a vector of modality weights  $\alpha_t$  corresponding to a different permutation of the concreteness-  
416 derived modality weights  $\alpha_{\text{concrete}}$  (**Figure 4A**). We then evaluated encoding model performance  
417 under the semantic embedding space generated by  $\alpha_t$ . If the amount of visual and linguistic  
418 information in each concept representation does not reflect concreteness, then model  
419 performance using the true concreteness scores should not be substantially different from  
420 performance using randomly permuted concreteness scores. However, if the amount of visual  
421 and linguistic information in each concept representation can be explained by concreteness,  
422 then model performance using the true concreteness scores should be much higher than  
423 performance using randomly permuted concreteness scores.

424  
425 We found that the encoding performance of the  $\alpha_{\text{concrete}}$  model was significantly higher than the  
426 permutation distribution of encoding performance when combined across subjects ( $q(\text{FDR}) < 10^{-4}$ ),  
427 and individually for 5 of 7 subjects ( $q(\text{FDR}) < 10^{-2}$ ) (**Figure 4B**). These results suggest that  
428 the amount of visual and linguistic information in each concept representation is significantly  
429 related to concreteness; more concrete concepts contain more visual information, while more  
430 abstract concepts contain more linguistic information.

431  
432 We next addressed the question of whether abstract concept representations contain *any*  
433 perceptual information. Traditional views propose a binary in which concrete concepts are  
434 represented by perceptual and linguistic information, while abstract concepts are represented  
435 solely by linguistic information (Dove, 2009; Paivio, 1991). Conversely, recent behavioral  
436 studies suggest that many abstract concepts contain some amount of perceptual information  
437 (Borghetti et al., 2017; Harpaintner et al., 2020, 2018). Extending these recent findings, our  
438 perceptual propagation method estimates visual embeddings of non-visual words by combining  
439 the visual embeddings of linguistically associated visual words. The visually grounded  $\alpha_{\text{concrete}}$   
440 models ( $b = -1, 0, 1, 10$ ) then assign each abstract word a positive weight on its estimated  
441 visual embedding, modeling the hypothesis that abstract concept representations contain visual  
442 information from linguistically associated visual concepts. Here, we directly tested if abstract  
443 concepts are better modeled by including some amount of this associated visual information, or  
444 solely by linguistic information.

445  
446 We operationalized the traditional binary view of abstractness by defining *abstractness cutoffs*  
447 on concreteness scores. For each abstractness cutoff, words with concreteness scores below  
448 the cutoff value were represented solely by their linguistic embeddings, while words with  
449 concreteness scores above the cutoff were represented by a weighted concatenation of visual  
450 and linguistic embeddings. Formally, this binary view of abstractness is captured by a modality  
451 weight model  $\alpha_{\text{binary}}$  with an abstractness cutoff parameter  $a$  (**Figure 4C**).  $\alpha_{\text{binary}}$  maps  
452 concreteness scores  $c$  below the cutoff to 0 and maps concreteness scores above the cutoff to  
453  $\alpha_{\text{concrete}}(c)$  (see **Methods**). If setting an abstractness cutoff increases performance relative to  
454  $\alpha_{\text{concrete}}$ , it would suggest that words with concreteness scores below the cutoff tend to be  
455 represented solely by linguistic information. However, if setting an abstractness cutoff  
456 decreases performance relative to  $\alpha_{\text{concrete}}$ , it would suggest that words with concreteness scores  
457 below the cutoff tend to be represented by a combination of visual and linguistic information.

458

459 We tested the  $\alpha_{\text{binary}}$  model for a range of abstractness cutoffs (**Figure 4D**). We used a linear  
 460 mixed-effects model to compare the performance difference between each  $\alpha_{\text{binary}}$  model (11  
 461 levels) and the  $\alpha_{\text{concrete}}$  model with subject identity as a random effect. This test showed that  
 462 performance difference varies significantly across  $\alpha_{\text{binary}}$  models (Wald  $\chi^2$  test,  $p < 10^{-4}$ ). A post  
 463 hoc test comparing the performance between each  $\alpha_{\text{binary}}$  model and the  $\alpha_{\text{concrete}}$  model found  
 464 that  $\alpha_{\text{binary}}$  models with abstractness cutoffs of 0.6, 0.8, 0.9, and 1.0 performed significantly  
 465 worse than the  $\alpha_{\text{concrete}}$  model ( $q(\text{FDR}) < 0.05$ ). These results suggest that many abstract  
 466 concepts ( $c < 0.6$ ) are represented in a format that includes perceptual information from  
 467 linguistically associated concrete concepts.

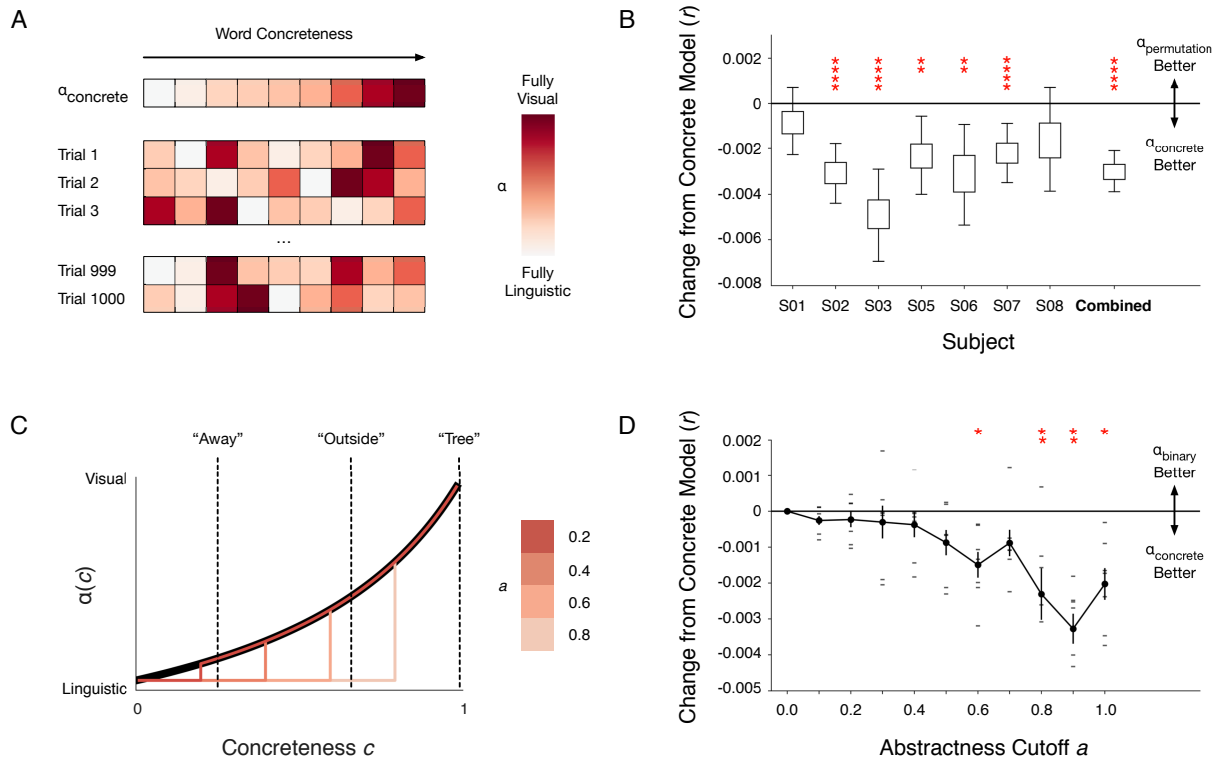

468 **Figure 4. Visual grounding of concrete and abstract concepts near visual cortex.** Encoding models fit under a visually  
 469 grounded  $\alpha_{\text{concrete}}$  modality weight model were compared to encoding models fit under alternative modality weight models.  
 470 Performance for each encoding model was quantified by averaging generalization performance (linear correlation  $r$ ) across all  
 471 significantly-predicted voxels within 15 mm of vision ROIs along the cortical surface. **(A)** A permutation test was performed to  
 472 quantify whether concreteness explains the amount of visual and linguistic information in each concept representation. In each trial,  
 473 concreteness scores were permuted across words before modality weights were computed under the  $\alpha_{\text{concrete}}$  model. **(B)** The  
 474 difference between the permutation distribution of encoding performance and the observed encoding performance of the  $\alpha_{\text{concrete}}$   
 475 model was first plotted for each subject, and then aggregated across the seven subjects. Boxes indicate the interquartile range of  
 476 the differences; whiskers indicate the 2.5th and 97.5th percentiles. If the true amount of visual information in each concept  
 477 representation increases with concreteness, the permutation distribution should be lower than the observed test statistic. If the true  
 478 amount of visual information in each concept representation is not related to concreteness, the permutation distribution should not,  
 479 on average, differ from the observed test statistic. Red asterisks signify that the permutation distribution is significantly lower than  
 480 the  $\alpha_{\text{concrete}}$  model performance for five of seven individual subjects, and combined across subjects. (\*,  $q(\text{FDR}) < 0.05$ ; \*\*,  $q(\text{FDR}) <$   
 481  $10^{-2}$ ; \*\*\*,  $q(\text{FDR}) < 10^{-3}$ ; \*\*\*\*,  $q(\text{FDR}) < 10^{-4}$ ). **(C)** The  $\alpha_{\text{binary}}$  model modifies the  $\alpha_{\text{concrete}}$  model to assign a modality weight of 0 to all  
 482 words with concreteness scores below an abstractness cutoff. Abstractness cutoffs operationalize the hypothesis that certain  
 483 abstract concepts are represented solely by linguistic information. **(D)** Model performance under the  $\alpha_{\text{binary}}$  model for different  
 484 abstractness cutoffs was compared to model performance under the  $\alpha_{\text{concrete}}$  model. Error bars indicate the standard error of the  
 485 mean across ( $n = 7$ ) subjects. Red asterisks signify that an  $\alpha_{\text{binary}}$  model performed significantly worse than the  $\alpha_{\text{concrete}}$  model (\*,  
 486

487  $q(\text{FDR}) < 0.05$ ; \*\*,  $q(\text{FDR}) < 10^{-2}$ ; \*\*\*,  $q(\text{FDR}) < 10^{-3}$ ; \*\*\*\*,  $q(\text{FDR}) < 10^{-4}$ ). These results suggest that many abstract concept  
488 representations ( $c < 0.6$ ) near visual cortex contain some amount of visual information.

489

### 490 **Representational format of concrete concepts across cortex.**

491

492 Our results suggest that cortical regions near the visual system represent concepts in a format  
493 that explicitly reflects visual information (**Figure 4**), supporting theories that the semantic  
494 representations of concrete concepts are formed through reuse of representations in adjacent  
495 perceptual systems (Barsalou, 2008; Binder and Desai, 2011). However, concrete concepts  
496 tend to be experienced through multiple perceptual modalities, and not solely vision (Lynott et  
497 al., 2020). Thus it remains unclear how their semantic representations might combine  
498 information from different perceptual systems. Grounded cognition theories predict that concrete  
499 concepts are represented near each perceptual system through which they are experienced  
500 using information from that particular perceptual modality (Barsalou, 2008; Martin, 2016).  
501 Alternatively, concrete concepts could be represented across cortex in a common multimodal  
502 format that combines representations from multiple perceptual modalities. For instance, (Amedi  
503 et al., 2001) found that certain regions in lateral occipital cortex are activated when subjects  
504 either view or hold an object, suggesting that these regions contain multimodal representations  
505 of object shape.

506

507 Our results thus far are consistent with both possibilities. Voxels near visual cortex may be best  
508 modeled by visually grounded embedding spaces because their representations specifically  
509 reflect visual information. However, it may also be possible that all concrete concepts are  
510 represented in a multimodal format that includes some visual information as well as information  
511 from other perceptual systems. In this case, voxels near visual cortex may be best modeled by  
512 visually grounded embedding spaces simply because they represent concrete concepts. To  
513 differentiate these possibilities, we quantified the *concrete selectivity* and *visual grounding* of  
514 each voxel in the semantic system. If concrete concepts are represented near each perceptual  
515 system in a format that specifically reflects the corresponding modality, we would expect visually  
516 grounded embedding spaces to only perform well near visual cortex. However, if concrete  
517 concepts are represented in a common multimodal format across cortex, we would expect  
518 visually grounded embedding spaces to perform well in all cortical regions that represent  
519 concrete concepts.

520

521 We defined a *concrete selectivity score* for each voxel by projecting its encoding model weights  
522 onto the vector of concreteness scores for each word. Voxels which tend to respond more to  
523 concrete words than abstract words will have positive concrete selectivity scores, while voxels  
524 which tend to respond more to abstract words than concrete words will have negative concrete  
525 selectivity scores. We defined a *visual grounding score* for each voxel as the difference in  
526 encoding model performance between the best performing visually grounded embedding space  
527 across cortex ( $b = -1$ ; see **Methods**) and the fully linguistic embedding space. Voxels that  
528 represent concepts using some amount of visual information will have positive visual grounding  
529 scores, while voxels which represent concepts using mostly linguistic information will have  
530 negative visual grounding scores.

531

532 We projected the concrete selectivity and visual grounding scores for each semantic system  
533 voxel onto a cortical flatmap. Each voxel was assigned a brightness based on its concrete  
534 selectivity score and a color based on its visual grounding score. In this visualization, concrete  
535 selective voxels appear red if they are best modeled by the visually grounded space, and blue if  
536 they are best modeled by the linguistic space. Abstract selective voxels appear black. The  
537 resulting map (**Figure 5A**; see **Figure S1** for other subjects) shows that voxels near perceptual  
538 systems (specifically visual cortex, somatosensory cortex, and auditory cortex) tend to be  
539 concrete selective, while voxels farther away in regions like temporoparietal junction (TPJ) tend  
540 to be abstract selective. These results replicate previous fMRI studies (Martin, 2016; Saxe and  
541 Kanwisher, 2003) mapping concrete and abstract concept representations across cortex.

542  
543 Consistent with our previous results, we found that concrete selective voxels near visual cortex  
544 tend to be best modeled by the visually grounded space. Conversely, we found that concrete  
545 selective voxels in inferior parietal cortex and intraparietal sulcus (IPS) tend to be better  
546 modeled by the linguistic space than the visually grounded space. Based on their proximity to  
547 functional regions involved in somatosensory and motor processing, we predict that these  
548 parietal voxels represent concrete concepts using tactile features such as affordances  
549 (Barsalou, 2008; Binder and Desai, 2011), which may happen to be more aligned with the  
550 linguistic embedding space than the visual embedding space. The linguistic space also  
551 outperformed the visually grounded space in many inferior temporal voxels. While these regions  
552 are located near visual cortex, previous studies have suggested that they contain multimodal  
553 representations of object shape that combine visual and tactile information (Amedi et al., 2001).  
554 Notably, this visualization shows that concrete concepts are not invariably represented across  
555 cortex in a format that reflects visual information.

556  
557 To quantify these results, we partitioned the set of semantic voxels with positive concrete  
558 selectivity scores into those located within 15mm of vision ROIs, and those located in other  
559 cortical regions. For each subset of concrete selective voxels, we computed the fraction with a  
560 positive visual grounding score (**Figure 5B**). Across subjects, 68 percent of concrete selective  
561 voxels near visual cortex were visually grounded, while only 49 percent of concrete selective  
562 voxels in other cortical regions were visually grounded. The fraction of concrete selective voxels  
563 that are visually grounded was significantly higher near visual cortex than in other cortical  
564 regions ( $p < 10^{-3}$ , paired  $t$ -test; see **Methods**).

565  
566 Together these results are consistent with the prediction that concrete concepts are represented  
567 near each perceptual system in a format that specifically reflects the corresponding modality. In  
568 particular, voxels near somatosensory and motor systems represent concrete concepts in a  
569 format that is *not* aligned with visual similarity, showing that concrete concepts are not invariably  
570 represented by visual information across cortex. However, because we do not explicitly model  
571 representations from non-visual perceptual systems, our results neither support nor challenge  
572 the existence of multimodal representations. While we have shown that certain concrete  
573 concept representations do not reflect visual information, it is possible that many voxels  
574 considered visually grounded in this study—particularly those farther from visual cortex (Binder  
575 and Desai, 2011)—may also reflect representations from other perceptual systems.



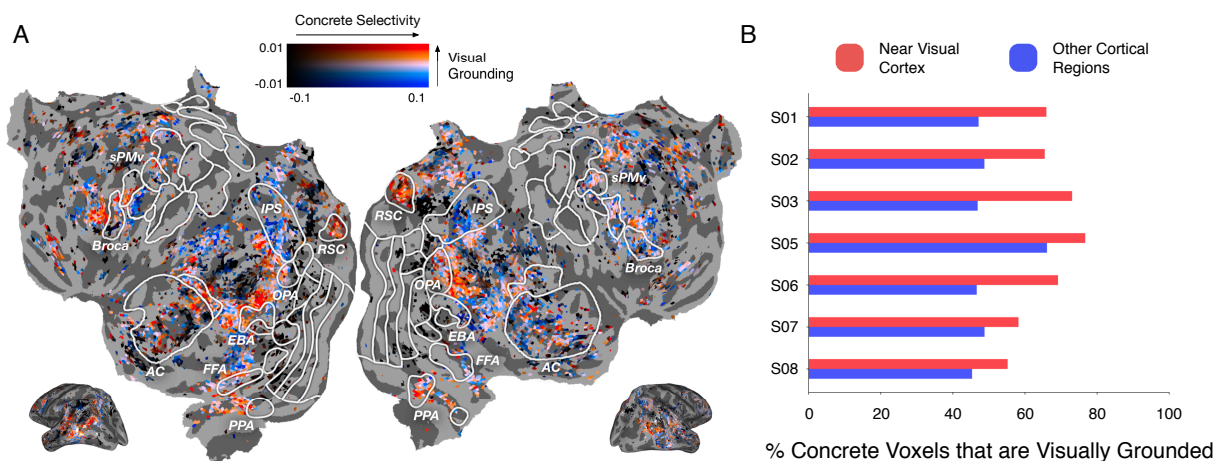

576  
577 **Figure 5. Representational format of concrete concepts across cortex.** A concrete selectivity score was computed for each  
578 voxel as the projection of its encoding weights onto the vector of concreteness scores for each word. A visual grounding score  
579 was computed for each voxel as the difference in model performance between a visually grounded encoding model ( $b = -1$ ) and a fully  
580 linguistic encoding model. (A) A cortical flatmap showing the concrete selectivity score and visual grounding score for each voxel in  
581 subject UT-S-02. Each semantic system voxel was assigned a brightness based on its concrete selectivity score and a color based  
582 on its visual grounding score. Concrete selective voxels were colored red if they are better modeled by the visually grounded space  
583 and blue if they are better modeled by the linguistic space. Abstract selective voxels were colored black. See Figure S2 for similar  
584 maps for other subjects and visually grounded embedding spaces. Concrete selective voxels near the visual system are better  
585 modeled by the visually grounded space, while concrete selective voxels near somatosensory and motor systems are better  
586 modeled by the linguistic space. (B) The fraction of concrete selective voxels that are visually grounded was plotted near visual  
587 cortex, and in other cortical regions. For each subject, the fraction of concrete selective voxels that are visually grounded is higher  
588 near visual cortex than in other cortical regions.

589

## 590 Discussion

591

592 Most people learn about the world through both vision and language. This study characterized  
593 how these two sources of information are combined in the semantic system by modeling cortical  
594 concept representations evoked by narrative stories. We first operationalized visual and  
595 linguistic information as different embedding spaces, and then created a spectrum of semantic  
596 embedding spaces to model different possibilities for how visual and linguistic information are  
597 combined. Comparing encoding model performance between different semantic embedding  
598 spaces, we found that cortical regions near the visual system represent concepts using some  
599 amount of visual information, while cortical regions near the language system represent  
600 concepts using mostly linguistic information. Focusing on regions near visual cortex, we next  
601 demonstrated that most concepts are best modeled by a combination of visual and linguistic  
602 information, with more concrete concepts containing more visual information. Notably, however,  
603 we found that even many abstract concepts contain some amount of visual information from  
604 linguistically associated concrete concepts. Finally, we found that the visual grounding of  
605 concrete concepts—which tend to be experienced through multiple perceptual modalities—is  
606 localized near visual cortex, suggesting that semantic representations near each perceptual  
607 system specifically reflect how information is represented in the corresponding modality.

608

609 To facilitate future work in this area, we are sharing the semantic embedding spectrum and  
610 code used to generate it (<https://github.com/jerrytang/grounded-embedding-spaces>). Further,

611 we plan to shortly release the entire fMRI dataset that was used in this study, which we hope  
612 will enable many future experiments since responses to natural language stimuli are highly  
613 reusable for asking many different scientific questions.

614  
615 While we found consistent and statistically significant differences between semantic encoding  
616 models, these differences are numerically small. This is likely a consequence of the regression  
617 approach used to estimate the encoding models. In a regularized, ridge regression-based  
618 encoding model, weights are estimated to maximize the likelihood of the brain responses given  
619 the stimulus, under a prior that similar words in the embedding space should have similar  
620 weights (Nunez-Elizalde et al., 2019). However, as the amount of training data increases, the  
621 model can learn accurate weights from the data alone, decreasing the relative impact of the  
622 embedding space prior. Consequently, while our large fMRI dataset increases our confidence in  
623 the differences between embedding spaces, it also leads these differences to be numerically  
624 small.

625  
626 Another potential issue is that the observed effects may not generalize beyond the narrative  
627 stories used to train and evaluate our encoding models. This issue of generalizability affects all  
628 fMRI experiments (Westfall et al., 2016). However, our study mitigates this issue to a large  
629 degree by using a very large set of natural language stimuli (5.37 hours or 55,144 total words)  
630 that span a broad space of semantic concepts, and an encoding framework in which we  
631 explicitly evaluate generalization performance of our models on multiple test stories. While  
632 issues of generalization can never be completely eliminated, our approach reduces this problem  
633 greatly compared to standard approaches in the field.

634  
635 Our analyses are also bounded by our computational models of visual and linguistic  
636 representations. While our exploratory analyses (**Figure 2**) show that the visual and linguistic  
637 embedding spaces capture different notions of similarity, the embedding spaces are inherently  
638 imperfect models of visual and linguistic processing. Consequently, our results may be  
639 confounded by biases in the embedding spaces. For instance, we identified many voxels that  
640 are best modeled by semantic embedding spaces that solely contain linguistic information and  
641 concluded that these voxels represent concepts in a format that reflects linguistic  
642 representations (**Figure 3**) or representations from non-visual perceptual systems (**Figure 5**).  
643 However, we may also observe these results if the voxels contain visually grounded  
644 representations of concepts that are poorly modeled by the visual embedding space. This issue  
645 affects all model comparison experiments (Anderson et al., 2019). Our study attempts to  
646 mitigate this issue by using state-of-the-art computational models of visual and linguistic  
647 information. The analyses introduced in this study are applicable to all models that can be  
648 expressed as word embedding spaces, and can thus be used to test future models of visual and  
649 linguistic processing.

650  
651 Finally, this study modeled semantic representations as combinations of visual and linguistic  
652 representations. However, there are many other sources through which humans acquire  
653 conceptual knowledge, such as somatosensation and emotion. We expect that some cortical  
654 regions that appear to reflect visual or linguistic representations may actually be best aligned

655 with concept representations in these other modalities (**Figure 5**). Furthermore, other cortical  
656 regions may contain multimodal representations that combine information from multiple  
657 perceptual modalities (Binder and Desai, 2011). An important direction for future work is  
658 developing computational models for these other sources of information and using them to  
659 create increasingly detailed models of the semantic system.

660

## 661 **Methods**

662

### 663 **MRI Data Collection**

664

665 MRI data were collected on a 3T Siemens Skyra scanner at the UT Austin Biomedical Imaging  
666 Center using a 64-channel Siemens volume coil. Functional scans were collected using a  
667 gradient echo EPI sequence with repetition time (TR) = 2.00 s, echo time (TE) = 30.8 ms, flip  
668 angle = 71°, multi-band factor (simultaneous multi-slice) = 2, voxel size = 2.6mm x 2.6mm x  
669 2.6mm (slice thickness = 2.6mm), matrix size = (84, 84), and field of view = 220 mm.

670

671 Anatomical data for all subjects except UT-S-02 were collected using a T1-weighted multi-echo  
672 MP-RAGE sequence on the same 3T scanner with voxel size = 1mm x 1mm x 1mm following  
673 the Freesurfer morphometry protocol. Anatomical data for subject UT-S-02 were collected on a  
674 3T Siemens TIM Trio scanner at the UC Berkeley Brain Imaging Center using a 32-channel  
675 Siemens volume coil using the same sequence.

676

### 677 **Subjects**

678

679 Data were collected from three female and four male human subjects: UT-S-01 (female, age  
680 24), UT-S-02 (author A.G.H., male, age 34), UT-S-03 (male, age 22), UT-S-05 (female, age 23),  
681 UT-S-06 (author A.L., female, age 23), UT-S-07 (male, age 25), and UT-S-08 (male, age 24). All  
682 subjects were healthy and had normal hearing, and normal or corrected-to-normal vision. The  
683 experimental protocol was approved by the Institutional Review Board at the University of Texas  
684 at Austin. Written informed consent was obtained from all subjects. To stabilize head motion  
685 during scanning sessions participants wore a personalized head case that precisely fit the  
686 shape of each participant's head (<https://caseforge.co/>).

687

### 688 **Natural Language Stimuli**

689

690 The model estimation and evaluation data set consisted of 25 10-15 min stories taken from *The*  
691 *Moth Radio Hour*. In each story, a single speaker tells an autobiographical story without reading  
692 from a prepared speech. Each story was played during one scan with a buffer of 10 seconds of  
693 silence before and after the story. Data collection was broken up into 6 different scanning  
694 sessions, with the first session consisting of the anatomical scan and localizers, and each  
695 subsequent session consisting of 5 or 6 stories. A separate repeated test data set consisted of  
696 one 10 min story, also taken from *The Moth Radio Hour*. This story was played five times for  
697 each subject (once during each story scanning session), and the five sets of responses were  
698 averaged.

699  
700 Stories were played over Sensimetrics S14 in-ear piezoelectric headphones. The audio for each  
701 story was filtered to correct for frequency response and phase errors induced by the  
702 headphones using calibration data provided by Sensimetrics and custom python code  
703 ([https://github.com/alexhuth/sensimetrics\\_filter](https://github.com/alexhuth/sensimetrics_filter)). All stimuli were played at 44.1 kHz using the  
704 pygame library in Python.

### 705 706 ***fMRI Data Preprocessing***

707  
708 All functional data were motion corrected using the FMRIB Linear Image Registration Tool  
709 (FLIRT) from FSL 5.0. FLIRT was used to align all data to a template that was made from the  
710 average of all functional runs in the first story session for each subject. These automatic  
711 alignments were manually checked for accuracy. Low frequency voxel response drift was  
712 identified using a 2<sup>nd</sup> order Savitzky-Golay filter with a 120 second window and then subtracted  
713 from the signal. To avoid onset artifacts and poor detrending performance near each end of the  
714 scan, responses were trimmed by removing 20 seconds (10 volumes) at the beginning and end  
715 of each scan, which removed the 10-second silent period and the first and last 10 seconds of  
716 each story. The mean response for each voxel was subtracted and the remaining response was  
717 scaled to have unit variance.

### 718 719 ***Flatmap Construction***

720  
721 Cortical surface meshes were generated from the T1-weighted anatomical scans using  
722 FreeSurfer software (Dale et al., 1999). Before surface reconstruction, anatomical surface  
723 segmentations were hand-checked and corrected. Blender was used to remove the corpus  
724 callosum and make relaxation cuts for flattening. Functional images were aligned to the cortical  
725 surface using boundary based registration (BBR) implemented in FSL. These alignments were  
726 manually checked for accuracy and adjustments were made as necessary.

727  
728 Flat maps were created by projecting the values for each voxel onto the cortical surface using  
729 the “nearest” scheme in pycortex software (Gao et al., 2015). This projection finds the location  
730 of each pixel in the flat map in 3D space and assigns that pixel the associated value.

### 731 732 ***Stimulus Preprocessing***

733  
734 Each story was manually transcribed by one listener. Certain sounds (for example, laughter and  
735 breathing) were also marked to improve the accuracy of the automated alignment. The audio of  
736 each story was then downsampled to 11kHz and the Penn Phonetics Lab Forced Aligner  
737 (P2FA) (Yuan and Liberman, 2008) was used to automatically align the audio to the transcript.  
738 Praat (Boersma and Weenink, 2014) was then used to check and correct each aligned  
739 transcript manually.

### 740 741 ***Localizers***

742 Known regions of interest (ROIs) were localized separately in each subject. Three different  
743 tasks were used to define ROIs; a visual category localizer, an auditory cortex localizer, and a  
744 motor localizer.

745  
746 Visual category localizer data were collected in six 4.5 minute scans consisting of 16 blocks of  
747 16 seconds each. During each block 20 images of either places, faces, bodies, household  
748 objects, or spatially scrambled objects were displayed. Subjects were asked to pay attention to  
749 the same image being presented twice in a row. The cortical ROIs defined with this localizer  
750 were the fusiform face area (FFA), parahippocampal place area (PPA), occipital place area  
751 (OPA), retrosplenial cortex (RSC), and extrastriate body area (EBA).

752  
753 Motor localizer data were collected in two identical 10 minute scans. The subject was cued to  
754 perform six different tasks in a random order in 20 second blocks. The cues were 'hand', 'foot',  
755 'mouth', 'speak', saccade, and 'rest' presented as a word at the center of the screen, except for  
756 the saccade cue which was presented as an array of dots. For the 'hand' cue, subjects were  
757 instructed to make small finger-drumming movements for the entirety of the cue display. For the  
758 'foot' cue, subjects were instructed to make small foot and toe movements. For the 'mouth' cue,  
759 subjects were instructed to make small vocalizations that were nonsense syllables such as  
760 *balabalabala*. For the 'speak' cue, subjects were instructed to self-generate a narrative without  
761 vocalization. For the saccade cue, subjects were instructed to make frequent saccades across  
762 the display screen for the duration of the task.

763  
764 Weight maps for the motor areas were used to define primary motor and somatosensory areas  
765 for the hands, feet, and mouth; supplemental motor areas for the hands and feet, secondary  
766 somatosensory areas for the hands, feet, and mouth, and the ventral premotor hand area. The  
767 weight map for the saccade responses was used to define the frontal eye fields and intraparietal  
768 sulcus visual areas. The weight map for speech was used to define Broca's area and the  
769 superior ventral premotor (sPMv) speech area (Chang et al., 2011).

770  
771 Auditory cortex localizer data were collected in one 10 minute scan. The subject listened to 10  
772 repeats of a 1-minute auditory stimulus containing 20 seconds of music (Arcade Fire), speech  
773 (Ira Glass, *This American Life*), and natural sound (a babbling brook). To determine whether a  
774 voxel was responsive to auditory stimulus, the repeatability of the voxel response across the 10  
775 repeats was calculated using an  $F$ -statistic. This map was used to define the auditory cortex  
776 (AC).

### 777 **Visual and Linguistic Embedding Spaces**

778  
779 We constructed a linguistic embedding space based on word co-occurrence statistics in a large  
780 corpus of text (same as de Heer et al., 2017; Deniz et al., 2019; Huth et al., 2016). First, we  
781 constructed a 10,470-word lexicon from the union of the set of all words appearing in the first 2  
782 story sessions and the 10,000 most common words in the large text corpus. We then selected  
783 985 basis words from Wikipedia's *List of 1000 Basic Words* (contrary to the title, this list  
784 contained only 985 unique words at the time it was accessed). This basis set was selected  
785

786 because it consists of common words that span a very broad range of topics. The text corpus  
787 used to construct this feature space includes the transcripts of 13 *Moth* stories (including 10  
788 used as stimuli in this experiment), 604 popular books, 2,405,569 Wikipedia pages, and  
789 36,333,459 user comments scraped from reddit.com. In total, the 10,470 words in our lexicon  
790 appeared 1,548,774,960 times in this corpus. Next, we constructed a word co-occurrence  
791 matrix,  $L$ , with 985 rows and 10,470 columns. Iterating through the text corpus, we added 1 to  
792  $L_{ij}$  each time word  $j$  appeared within 15 words of basis word  $i$ . A window size of 15 was selected  
793 to be large enough to suppress syntactic effects (that is, word order) but no larger. Once the  
794 word co-occurrence matrix was complete, we log-transformed the counts, replacing  $L_{ij}$  with  
795  $\log(1 + L_{ij})$ . Next, each row of  $L$  was z-scored to correct for differences in basis word frequency,  
796 and then each column of  $L$  was z-scored to correct for word frequency. Each column of  $L$  is now  
797 a 985-dimensional vector representing one word in the lexicon. We then filtered the columns of  
798  $L$  for the 3,933 unique words that occur in the stimulus stories. The linguistic embedding space  
799 is summarized by the covariance matrix  $\Sigma_L = L^T L$ , where  $(\Sigma_L)_{ij}$  captures the degree of linguistic  
800 similarity between words  $i$  and  $j$ .

801  
802 We constructed a visual embedding space based on embeddings extracted using a  
803 convolutional neural network (CNN). First, we defined a set of potential visual words from the  
804 union of words appearing in the first 2 story sessions and words with a concreteness rating  $\hat{c}$   
805 greater than or equal to 4.6 out of 5 in the Brysbaert Concreteness Ratings dataset (Brysbaert  
806 et al., 2014). We manually assigned each potential visual word the WordNet (Miller, 1995)  
807 synset that best corresponds to its linguistic meaning, which was inferred from the word's 10  
808 nearest neighbors in the linguistic embedding space  $\Sigma_L$ . We then identified 720 visual words  
809 with ImageNet (Deng et al., 2009) entries corresponding to their assigned WordNet synsets. Of  
810 the 720 visual words, 394 were contained in the stimulus vocabulary. The 3,539 words in our  
811 stimulus vocabulary without corresponding ImageNet entries were considered non-visual. For  
812 each visual word, 100 images were randomly sampled from its ImageNet entry. 4,096-  
813 dimensional CNN embeddings were extracted for each image using the fc1 layer of a pretrained  
814 VGG16 (Simonyan and Zisserman, 2015) CNN implemented in Keras (Chollet and Others,  
815 2015). We chose the feature extraction layer by fitting language encoding models (described  
816 below) induced by each layer of VGG16 on a single test subject (UT-S-02); fc1 attained the  
817 highest prediction performance across cortex. We obtained a CNN embedding for each visual  
818 word by averaging the extracted features across the 100 sampled images. The CNN  
819 embeddings were stored as columns in a matrix  $C$  with 4,096 rows and 720 columns.

820  
821 We developed a perceptual propagation method to construct a matrix  $V$  of visual embeddings  
822 for both visual and non-visual words. We defined the linguistic submatrix  $L_v$  with 985 rows and  
823 720 columns as the linguistic embeddings of the visual words. We then fit a linear model  $\theta$  as  $L^T$   
824  $= \theta L_v^T$  to reconstruct each word's linguistic embedding as a linear combination of the linguistic  
825 embeddings of visual words. For each word  $w$ , row  $\theta_w$  contains 720 weights, which capture the  
826 degree to which each visual word contributes to the linguistic meaning of  $w$ . The matrix  $V$  of  
827 visual embeddings was then estimated by  $V^T = \theta C^T$ .  $V$  represents non-visual words as linear  
828 combinations of the CNN embeddings of associated visual words.  $V$  additionally combines each  
829 visual word's CNN embedding with CNN embeddings of associated visual words, which

830 smooths the visual embedding space (Collell et al., 2017). Finally, each column of  $V$ , which  
831 corresponds to the visual embedding of a word, was z-scored. The visual embedding space is  
832 summarized by the covariance matrix  $\Sigma_V = V^T V$ , where  $(\Sigma_V)_{i,j}$  captures the degree of visual  
833 similarity between words  $i$  and  $j$ .

834  
835 We fit the perceptual propagation model  $\theta$  using Tikhonov regression with prior covariance  
836 matrix  $\Omega$  and regularization constant  $\lambda$ . We chose  $\lambda$  as the smallest value for which the first  
837 eigenvalue of the visual embedding space  $\Sigma_V$  was approximately equal to that of the linguistic  
838 space  $\Sigma_L$ , in an effort to keep the smoothness of the visual embedding space as similar as  
839 possible to the linguistic embedding space. We tested two different prior covariance matrices; a  
840 spherical prior  $\Omega_I$  that corresponds to ridge regression, and a CNN prior  $\Omega_C = C^T C$  which  
841 enforces that visual words with similar CNN embeddings have similar weights in  $\theta$ . We found  
842 that for non-visual words, the associated visual words obtained under the spherical prior were  
843 more semantically diverse, while the associated visual words obtained under the CNN prior  
844 were more visually coherent. For example, the top associated words for “education” under the  
845 spherical prior were “school”, “college”, “university”, “student”, and “conservative”, while the top  
846 associated words under the CNN prior were “instructor”, “teacher”, “grade”, “student”, and  
847 “classroom” (which all depict a classroom setting). As the two priors capture different types of  
848 information, our perceptual propagation model  $\theta$  was obtained by averaging the models  $\theta_I$  and  
849  $\theta_C$ .

### 851 **Concreteness Scores**

852  
853 We quantified the concreteness of each stimulus word using scores derived from the separate  
854 Brysbaert Concreteness Ratings dataset. The Brysbaert dataset contains human ratings  $\hat{c}$  of the  
855 extent to which each word can be experienced through sensation. The concreteness ratings  
856 range from 1 (very abstract) to 5 (very concrete). We scaled the ratings between 0 (very  
857 abstract) and 1 (very concrete) by subtracting 1 and dividing by the range 4, and then squared  
858 the resulting values to obtain concreteness scores  $c$ . To interpolate concreteness scores for  
859 stimulus words that were not included in the Brysbaert dataset, each word  $w$  was assigned the  
860 max of its own concreteness score  $c_w$  (where  $c_w = 0$  if  $w$  is not contained in the Brysbaert  
861 dataset) and the mean concreteness score of its 15 closest linguistic neighbors. Each word’s  
862 concreteness score  $c_w$  was thus given as  $\max(c_w, \frac{1}{15} \sum_{n \in nn(w)} c_n)$ , where the nearest neighbors  
863 function  $nn(w)$  gives the 15 closest words (where similarity is defined under  $\Sigma_L$ ) to  $w$  in the  
864 Brysbaert dataset.

### 866 **Visualizing Embedding Space Structure**

867  
868 We used PCA to visualize the structure of the visual and linguistic embedding spaces. For each  
869 space, we applied PCA to the embeddings of the 394 visual words that occur in the stimulus  
870 stories, and projected each word’s embedding onto the first two PCs. The first two PCs of the  
871 visual space account for 24.5% of the variance, and the first two PCs of the linguistic space  
872 account for 22.9% of the variance. For each embedding space, we plotted the two-dimensional  
873 projection of each visual word.

874  
875 To highlight how notions of similarity differ between the visual and linguistic spaces, we  
876 identified 3 broad semantic categories; *people*, *clothes*, and *places*. For each category, we  
877 hand-selected 10 representative words prior to visualization, and colored the convex hull of the  
878 representative words in the two-dimensional visualization of each embedding space.

### 879 **Quantifying Word-level Differences in Embedding Spaces**

880  
881 For each word  $w$ , we defined a visual similarity vector  $(\Sigma_V)_w$  containing its visual similarities with  
882 every other word, and a linguistic similarity vector  $(\Sigma_L)_w$  containing its linguistic similarities with  
883 every other word. We computed a modality alignment score for each word as the linear  
884 correlation between its visual and linguistic similarity vectors. Words with high modality  
885 alignment scores are represented similarly in the visual and linguistic embedding spaces, while  
886 words with low modality alignment scores are represented differently in the visual and linguistic  
887 embedding spaces.  
888

889  
890 Across stimulus words, modality alignment scores  $m$  were anticorrelated with concreteness  
891 scores  $c$  (linear correlation  $r = -0.26$ ). The linear least squares regression line between  
892 concreteness scores and modality alignment scores is  $m = -0.13c + 0.76$ .

### 893 **Semantic Embedding Spectrum**

894  
895 We created semantic embeddings  $S_w$  for each word  $w$  by concatenating its visual embedding  $V_w$   
896 and its linguistic embedding  $L_w$ . Each word was assigned a modality weight  $\alpha_w$  between 0 and 1  
897 to model the relative contributions of its visual and linguistic representations to its semantic  
898 representation. Prior to concatenation  $V_w$  was scaled to unit norm and then multiplied by  $\alpha_w^{1/2}$   
899 while  $L_w$  was scaled to unit norm and then multiplied by  $(1 - \alpha_w)^{1/2}$ . When  $\alpha_w$  is 1 the semantic  
900 embedding  $S_w$  will fully reflect the visual embedding, and when  $\alpha_w$  is 0 the semantic embedding  
901  $S_w$  will fully reflect the linguistic embedding. Semantic embedding spaces are summarized by  
902 the covariance matrices  $\Sigma_S = S^T S$ . The semantic similarity  $(\Sigma_S)_{i,j}$  between words  $i$  and  $j$  is an  
903 average of their visual similarity  $\Sigma_V$  weighted by  $\alpha_i^{1/2}\alpha_j^{1/2}$  and their linguistic similarity  $\Sigma_L$  weighted  
904 by  $(1 - \alpha_i)^{1/2}(1 - \alpha_j)^{1/2}$ .  
905

906  
907 Each semantic embedding space is parameterized by a vector  $\alpha$  containing the modality weight  
908  $\alpha_w$  for each word  $w$ . To constrain the infinitely large space of  $\alpha$  vectors we modeled each word's  
909 modality weight  $\alpha_w$  as a monotonically increasing function  $\alpha_{\text{concrete}}(c; b) = \sigma(\sigma^{-1}(c) + b)$  of its  
910 concreteness score  $c_w$ , where  $\sigma$  is the sigmoid function  $\sigma(x) = e^x/(e^x + 1)$ . The  $\alpha_{\text{concrete}}$  model has  
911 a single bias parameter  $b$  that controls the total amount of visual information in each word's  
912 semantic embedding. As  $b$  approaches negative infinity,  $\alpha(c_w)$  approaches 0 for all  $c_w$ , causing  
913  $\Sigma_S$  to approach  $\Sigma_L$ . As  $b$  approaches infinity,  $\alpha(c_w)$  approaches 1 for all  $c_w$ , causing  $\Sigma_S$  to  
914 approach  $\Sigma_V$ .  
915

916 For our analyses, we chose 5 values of  $b$  (-10, -1, 0, 1, 10), which induce semantic embedding  
917 spaces that smoothly interpolate between the linguistic space  $\Sigma_L$  and the visual space  $\Sigma_V$ . This



918 semantic embedding spectrum contains a fully linguistic embedding space ( $b = -10$ ) and a range  
919 of visually grounded embedding spaces ( $b = -1, 0, 1, 10$ )

920

### 921 **Voxelwise Encoding Models**

922

923 fMRI encoding models are estimated on a set of training stories  $S_{\text{train}}$  and evaluated on a set of  
924 test stories  $S_{\text{test}}$ . In model estimation, a response matrix  $Y_{\text{train}}$  is constructed by concatenating  
925 the fMRI responses to stories in  $S_{\text{train}}$ . To construct the stimulus matrix  $X_{\text{train}}$ , each word in  $S_{\text{train}}$  is  
926 first represented by a one-hot indicator vector corresponding to its identity in the 3,933-word  
927 stimulus vocabulary. The resulting binary matrix is then downsampled to the MR acquisition  
928 times using a 3-lobe Lanczos filter, yielding a  $t$ -by-3,933 dimensional word matrix  $W_{\text{train}}$ , where  $t$   
929 is the number of fMRI images in  $Y_{\text{train}}$ . The word matrix  $W_{\text{train}}$  is then projected onto a feature  
930 matrix  $P$  which contains a  $p$ -dimensional embedding for each word, yielding the  $t$ -by- $p$   
931 dimensional stimulus matrix  $X_{\text{train}}$ . Each feature channel of  $X_{\text{train}}$  is z-scored to match the  
932 features to the fMRI responses, which are z-scored within each story.

933

934 A linearized finite impulse response (FIR) model is fit to every cortical voxel in each subject's  
935 brain. A separate linear temporal filter with four delays (1, 2, 3, and 4 time points) is fit for each  
936 of the  $p$  stimulus features, yielding a total of  $4p$  features. This is accomplished by concatenating  
937 feature vectors that have been delayed by 1, 2, 3, and 4 time points (2, 4, 6, and 8 s). Taking  
938 the dot product of this concatenated feature space with a set of linear weights is functionally  
939 equivalent to convolving the original stimulus vectors with linear temporal kernels that have non-  
940 zero entries for 1-, 2-, 3-, and 4-time-point delays.

941

942 The  $4p$  weights for each voxel are estimated from  $X_{\text{train}}$  and  $Y_{\text{train}}$  using L2-regularized linear  
943 regression (also known as ridge regression). The regression procedure has a single free  
944 parameter which controls the degree of regularization. This regularization coefficient is found for  
945 each voxel by repeating a regression and cross-validation procedure 50 times. In each iteration,  
946 approximately a fifth of the time points ( $t / 200$  blocks of 40 consecutive time points each) are  
947 removed from the training data set and reserved for validation. Then the model weights are  
948 estimated on the remaining time points for each of 15 possible regularization coefficients (log  
949 spaced between 10 and 10,000). These weights are used to predict responses for the reserved  
950 time points, and prediction performance is computed between the predicted and actual  
951 responses. For each voxel, the regularization coefficient is chosen as the value that led to the  
952 best performance, averaged across bootstraps, on the reserved time points. For models where  
953 the sizes of the responses should be preserved (word-rate encoding models; described below),  
954 the regularization coefficient was optimized using  $R^2$  as the performance metric. For models  
955 where the sizes of the predicted responses do not matter (semantic encoding models; described  
956 below), the regularization coefficient was optimized using linear correlation as the performance  
957 metric.

958

959 The regression procedure produces a set of estimated feature weights  $\beta^P$ , with columns  
960 corresponding to the  $4p$  weights for each voxel. To evaluate a voxel-wise model,  $\beta^P$  is used to  
961 predict brain responses to stories in a test dataset  $S_{\text{test}}$  that were not used for model estimation.

962 For each story  $s$  in  $S_{\text{test}}$ , a stimulus matrix  $X_s$  and a response matrix  $Y_s$  are constructed using the  
963 procedure described above for constructing  $X_{\text{train}}$  and  $Y_{\text{train}}$ . Each feature channel of  $X_s$  is  
964 normalized using the mean and standard deviation of the corresponding channel in  $X_{\text{train}}$ . For  
965 each voxel, prediction performance on each test story is estimated as the linear correlation  
966 between predicted and actual responses over the time points in the story. Overall prediction  
967 performance on  $S_{\text{test}}$  is obtained by averaging the voxel's prediction performance across the  
968 stories in  $S_{\text{test}}$ .

### 969 **Encoding Model Estimation**

970  
971  
972 Before fitting semantic encoding models, we first fit a word-rate encoding model for each subject  
973 to remove variance in the response data that could be explained by low-level auditory features.  
974 The word-rate model represents stimulus words with a 3,933-by-1 dimensional matrix of ones  
975  $P_{WR}$ . We estimated word-rate weights  $\beta_{WR}$  using all 5 story sessions as the training set  $S_{\text{train}}$ . L2  
976 regularization coefficients were chosen by maximizing  $R^2$  in the cross-validation procedure. For  
977 each of the 25 stimulus stories and the repeated test story, we predicted brain responses  $Y_{WR} =$   
978  $X\beta_{WR}$  using the word rate model. The word-rate predictions  $Y_{WR}$  were subtracted from the actual  
979 brain responses  $Y$ , which were then z-scored to produce word-rate corrected brain responses.  
980 Semantic encoding models were then fit to the word-rate corrected brain responses.

981  
982 To fit a semantic encoding model with embedding space prior  $\Sigma$ , stimulus words were  
983 represented by embedding features  $P = \Sigma^{1/2}$ . Previous work shows that performing ridge  
984 regression on the stimulus matrix  $X = W\Sigma^{1/2}$  is equivalent to performing Tikhonov regression on  
985 the word matrix  $W$  using  $\Sigma$  as the prior covariance (Nunez-Elizalde et al., 2019). L2  
986 regularization coefficients were chosen by maximizing linear correlation in the cross-validation  
987 procedure. This procedure for solving Tikhonov regression yields a set of weights  $\beta^P$  on  
988 embedding features  $P$ . To represent the encoding model as weights on individual words, rather  
989 than weights on embedding features, we left-multiplied the feature space weights  $\beta^P$  by the  
990 delayed embedding features to obtain word-space weights  $\beta^W = (I_4 \otimes \Sigma^{1/2})\beta^P$ . Each column of  
991 the weight matrix  $\beta^W$  contains a set of 15,732 estimated weights for a corresponding voxel.  
992 These weights predict how each of the 3,933 words in the stimulus vocabulary influences the  
993 BOLD responses in that voxel at each of the four temporal delays. When estimating the  
994 selectivity of each voxel for each word (**Figure 5**), we removed temporal information by  
995 averaging across the four delays for each word. Each voxel is then represented by a set of  
996 3,933 averaged weights which predict how each word in the stimulus vocabulary influences the  
997 BOLD responses in that voxel.

998  
999 To compare model performance under different embedding space priors (**Figure 3**), we  
1000 estimated and evaluated encoding models using a bootstrap procedure across story sessions.  
1001 For each of the 5 story sessions, we held out the chosen session as  $S_{\text{test}}$  and estimated  
1002 encoding models using the remaining 4 story sessions as  $S_{\text{train}}$ . We then computed prediction  
1003 performance of the estimated models on each story in  $S_{\text{test}}$ . Repeating this process for each  
1004 story session yielded prediction performance on all 25 stimulus stories. Aggregate performance  
1005 was obtained by averaging performance across the 25 stories. As the stimulus stories vary in

1006 semantic content and imageability, maximizing the number of evaluation stories was desirable  
1007 for identifying the embedding space that best models each voxel. Because this session  
1008 bootstrap procedure evaluated encoding models on single repetitions of many stories rather  
1009 than many repetitions of a single story (de Heer et al., 2017; Huth et al., 2016; Jain and Huth,  
1010 2018), our reported prediction performance values were lower than previously reported results  
1011 due to the lower signal-to-noise ratio of single repetition response data.

1012  
1013 A downside to the story session bootstrap procedure is that the 5 story sessions produce 5  
1014 separate encoding models. As the encoding models were not estimated using independent  
1015 data, their weights cannot be meaningfully combined. Furthermore, the story session bootstrap  
1016 procedure is computationally intensive. For analyses estimating voxel selectivity from encoding  
1017 model weights (**Figure 5**) and analyses that compare a large number of encoding models  
1018 (**Figure 4**), we instead split the story sessions into explicit train and test sessions. This  
1019 procedure produces a single set of encoding model weights. The number of training and test  
1020 sessions used depends on the nature of each analysis, as described below.

1021  
1022 All model fitting and analysis was performed using custom software written in Python, making  
1023 heavy use of NumPy (Oliphant, 2006), SciPy (Jones et al., 2001), and pycortex (Gao et al.,  
1024 2015).

### 1025 **Semantic System Voxels**

1026  
1027  
1028 Semantic system voxels were defined as voxels that were significantly predicted by any space  
1029 in the semantic embedding spectrum. We tested for significance using a permutation test on the  
1030 repeated test story  $S_{\text{reptest}}$ . The embedding spectrum performance for each voxel was defined as  
1031 the maximum linear correlation  $r$  between the true response time course and the predicted  
1032 response time course under each semantic embedding space. We then constructed a null  
1033 distribution on embedding spectrum performance for each voxel by permuting the voxel's true  
1034 response time course. In each trial, we randomly resampled (with replacement) 10-TR blocks  
1035 from the voxel's true response time course. Resampling contiguous blocks preserves the auto-  
1036 correlation structure of the voxel's responses. We then computed null embedding spectrum  
1037 performance as the maximum linear correlation  $r$  between the permuted response time course  
1038 and the predicted response time course under each semantic embedding space. Repeating this  
1039 process for 10,000 trials provided a null distribution of embedding spectrum performance for  
1040 each voxel. Semantic system voxels were identified as voxels with an observed embedding  
1041 spectrum performance that is significantly higher than its null distribution ( $q(\text{FDR}) < 0.05$ ),  
1042 correcting for multiple comparisons using the false discovery rate (Benjamini and Hochberg,  
1043 1995).

1044  
1045 For encoding models estimated using the session bootstrap procedure (**Figures 3, 5**) we  
1046 averaged across the 5 sets of encoding weights (corresponding to each bootstrap session) to  
1047 predict responses to the repeated test story. This yielded 8,578 semantic system voxels in  
1048 subject UT-S-01, 13,502 semantic system voxels in UT-S-02, 17,135 semantic system voxels in

1049 UT-S-03, 3,835 semantic system voxels in UT-S-05, 5,504 semantic system voxels in UT-S-06,  
1050 3,065 semantic system voxels in UT-S-07, and 1,321 semantic system voxels in UT-S-08.

1051

1052 For encoding models estimated using an explicit train-test split (**Figure 4**) we predicted  
1053 responses to the repeated test story using the single set of encoding weights. This yielded  
1054 7,047 semantic system voxels in subject UT-S-01, 11,933 semantic system voxels in UT-S-02,  
1055 12,807 semantic system voxels in UT-S-03, 3,338 semantic system voxels in UT-S-05, 2,539  
1056 semantic system voxels in UT-S-06, 2,230 semantic system voxels in UT-S-07, and 807  
1057 semantic system voxels in UT-S-08.

1058

### 1059 **Linear Mixed-effects Modeling**

1060

1061 A linear mixed-effects model (lme) was used to compare the performance of different spaces in  
1062 the semantic embedding spectrum around vision and language ROIs. We identified vision (FFA,  
1063 PPA, OPA, RSC, EBA) and language (AC, Broca, sPMv) ROIs in each subject using separate  
1064 localizer data (described above). We used pycortex software (Gao et al., 2015) to identify  
1065 semantic system voxels within 15mm of each ROI along the cortical surface. For each ROI, we  
1066 first identified all vertices on the fiducial surface that fall within the ROI definition. We then  
1067 computed the geodesic distance from each surface vertex to the closest vertex in the ROI. We  
1068 defined ROI-adjacent vertices as vertices within 15mm of the ROI vertices. We finally used the  
1069 “cortical” scheme in pycortex to select all voxels with centers within the cortical ribbon where the  
1070 closest vertex is ROI-adjacent.

1071

1072 For each subject, the performance of each embedding space around an ROI was computed by  
1073 averaging the prediction performance of the corresponding encoding model (estimated under  
1074 the story session bootstrap encoding procedure) across semantic system voxels within 15mm of  
1075 the ROI. We then computed a visual grounding score for each visually grounded embedding  
1076 space as its performance improvement over the fully linguistic embedding space. Our linear  
1077 mixed-effects model compared visual grounding score for each visually grounded embedding  
1078 space (4 levels:  $b = -1, 0, 1, 10$ ) and ROI type (2 levels: vision, language). The ROI ID nested  
1079 within subject ID was the random effect. The lme test was run in R using the lme4 library (Bates  
1080 et al., 2015). For post hoc tests,  $p$ -values were corrected for multiple comparisons using the  
1081 false discovery rate.

1082

1083 For each ROI, we plotted the visual grounding score for each visually grounded embedding  
1084 space. We then plotted mean visual grounding score across vision and language ROIs for each  
1085 visually grounded embedding space. All values were averaged across 7 subjects. Error bars  
1086 indicate standard error of the mean across 7 subjects.

1087

### 1088 **Modality Weight Permutation Test**

1089

1090 We conducted a two-tailed permutation test to determine whether the amount of visual  
1091 information in each word’s semantic representation around visual cortex is related to  
1092 concreteness. We first identified the best  $\alpha_{\text{concrete}}$  model around visual cortex ( $b = -1$ ) by

1093 comparing encoding model performance on the repeated test set  $S_{\text{reptest}}$ . We then fit semantic  
1094 encoding models using the first 3 story sessions as  $S_{\text{train}}$  and the remaining 2 story sessions as  
1095  $S_{\text{test}}$ . L2 regularization coefficients were chosen by maximizing linear correlation in the cross-  
1096 validation procedure. Encoding model performance (linear correlation  $r$ ) was averaged across  
1097 semantic system voxels within 15mm of vision ROIs (FFA, PPA, OPA, RSC, EBA) along the  
1098 cortical surface.

1099  
1100 We next conducted 1,000 trials in which we permuted concreteness scores across words before  
1101 computing modality weights under the  $\alpha_{\text{concrete}}$  model ( $b = -1$ ). In trial  $t$  of the permutation test,  
1102 the modality weights across stimulus words were given by a vector  $\alpha_t$  corresponding to a  
1103 random permutation of the concreteness-derived modality weights  $\alpha_{\text{concrete}}$ . We then fit an  
1104 encoding model under the semantic embedding space induced by  $\alpha_t$  and averaged encoding  
1105 model performance across the tested voxels. For each voxel, we reused the L2 regularization  
1106 coefficient previously optimized for the  $\alpha_{\text{concrete}}$  encoding model.

1107  
1108 The 1,000 trials provide a permutation distribution of the encoding model performance. The  
1109 permutation distribution was significantly lower than the observed performance of the  $\alpha_{\text{concrete}}$   
1110 model when combined across subjects ( $q(\text{FDR}) < 10^{-4}$ ), and individually for five of seven  
1111 subjects ( $q(\text{FDR}) < 10^{-2}$ ).

### 1112 **Binary Modality Weight Model**

1113  
1114  
1115 The visually grounded parameterizations ( $b = -1, 0, 1, 10$ ) of the  $\alpha_{\text{concrete}}$  modality weight model  
1116 predict that all abstract words contain some amount of visual information. To capture the  
1117 alternative hypothesis that abstract words solely contain linguistic information, we defined an  
1118  $\alpha_{\text{binary}}$  modality weight model parameterized by an abstractness cutoff  $a$ . Words with  
1119 concreteness scores below the cutoff were considered purely abstract and represented solely  
1120 by their linguistic embeddings, while words with concreteness scores above than the cutoff were  
1121 represented by a combination of their visual and linguistic embeddings specified in the  $\alpha_{\text{concrete}}$   
1122 model. Formally,  $\alpha_{\text{binary}}(c; a, b)$  is a piecewise function that outputs 0 if  $c$  is less than  $a$ , and  
1123  $\alpha_{\text{concrete}}(c; b)$  otherwise. To directly compare  $\alpha_{\text{concrete}}$  and  $\alpha_{\text{binary}}$ , both models were parameterized  
1124 by the best bias parameter for  $\alpha_{\text{concrete}}$  around visual cortex ( $b = -1$ ), which was determined by  
1125 comparing encoding model performance on the repeated test set  $S_{\text{reptest}}$ .

1126  
1127 We compared the  $\alpha_{\text{concrete}}$  model against the  $\alpha_{\text{binary}}$  model for a range of abstractness cutoffs ( $a =$   
1128  $0.1, 0.2, 0.3, 0.4, 0.5, 0.6, 0.7, 0.8, 0.9, 1.0$ ). For each modality weight model, we fit a semantic  
1129 encoding model under the induced embedding space using the first 3 story sessions as  $S_{\text{train}}$   
1130 and the remaining 2 story sessions as  $S_{\text{test}}$ . For both the  $\alpha_{\text{concrete}}$  and  $\alpha_{\text{binary}}$  encoding models, L2  
1131 regularization coefficients were chosen by maximizing linear correlation in the cross-validation  
1132 procedure. Encoding model performance (linear correlation  $r$ ) was averaged across semantic  
1133 system voxels within 15mm of vision ROIs (FFA, PPA, OPA, RSC, EBA) along the cortical  
1134 surface.

1135

1136 A linear mixed-effects model (lme) was used to compare the performance difference between  
1137 each  $\alpha_{\text{binary}}$  model and the  $\alpha_{\text{concrete}}$  model (11 levels:  $a = 0.1, 0.2, 0.3, 0.4, 0.5, 0.6, 0.7, 0.8, 0.9,$   
1138  $1.0$ ). The subject ID was the random effect. The lme test was run in R using the lme4 library  
1139 (Bates et al., 2015). For post hoc tests,  $p$ -values were corrected for multiple comparisons using  
1140 the false discovery rate.  $\alpha_{\text{binary}}$  models with concrete cutoffs of 0.6, 0.8, 0.9, and 1.0 performed  
1141 significantly worse than the  $\alpha_{\text{concrete}}$  model ( $q(\text{FDR}) < 0.05$ ).

1142

### 1143 **Visual Grounding of Concrete Selective Voxels**

1144

1145 We defined a concrete selectivity score for each voxel to quantify the degree to which it  
1146 responds to concrete words. We fit encoding models under the fully linguistic embedding space  
1147 using all 5 story sessions as  $S_{\text{train}}$ . The estimated encoding weights (averaged across delays)  
1148 predict the degree to which each word influences BOLD responses in each voxel. We then  
1149 projected a vector of concreteness scores for each word onto the encoding weights for each  
1150 voxel. We divided each voxel's score by the sum of its absolute weights on each word. Concrete  
1151 selectivity scores range from -1 to 1; voxels that respond more to concrete words than abstract  
1152 words will have positive concrete selectivity scores, while voxels that respond more to abstract  
1153 words than concrete words will have negative concrete selectivity scores.

1154

1155 We defined a visual grounding score for each voxel to quantify the degree to which it represents  
1156 concepts in a visually grounded format. We determined the best visually grounded  
1157 parameterization of  $\alpha_{\text{concrete}}$  across visual cortex ( $b = -1$ ) by comparing encoding model  
1158 performance on the repeated test set  $S_{\text{reptest}}$ . The visual grounding score of each voxel was then  
1159 defined as the difference in encoding model performance (estimated under the story session  
1160 bootstrap procedure) between the visually grounded embedding space ( $b = -1$ ) and the fully  
1161 linguistic embedding space ( $b = -10$ ). Visual grounding scores range from -1 to 1; voxels that  
1162 represent concepts in a visually grounded format will have positive visual grounding scores,  
1163 while voxels that represent concepts in a linguistic format will have negative visual grounding  
1164 scores.

1165

1166 We defined concrete selective voxels as semantic system voxels with a positive concrete  
1167 selectivity score. We tested whether concrete selective voxels are more visually grounded near  
1168 visual cortex than in other cortical regions. We partitioned concrete selective voxels into those  
1169 near visual cortex (within 15mm of visual ROIs) and those in other cortical regions. For each  
1170 subset of concrete selective voxels, we computed the fraction that are visually grounded (visual  
1171 grounding score  $> 0$ ). Combined across subjects, 68 percent of concrete selective voxels near  
1172 visual cortex were visually grounded, while 49 percent of concrete selective voxels in other  
1173 cortical regions were visually grounded. We conducted a two-tailed paired t-test across subjects  
1174 comparing the fraction of concrete selective voxels near visual cortex that are visually grounded  
1175 to the fraction of concrete selective voxels in other cortical regions that are visually grounded.  
1176 We found that concrete selective voxels were significantly more likely to be visually grounded  
1177 near visual cortex than in other cortical regions ( $p < 0.01$ ).

## References

- 1178  
1179  
1180 Amedi A, Malach R, Hendler T, Peled S, Zohary E. 2001. Visuo-haptic object-related activation  
1181 in the ventral visual pathway. *Nat Neurosci* **4**:324–330.  
1182 Anderson AJ, Binder JR, Fernandino L, Humphries CJ, Conant LL, Raizada RDS, Lin F, Lalor  
1183 EC. 2019. An Integrated Neural Decoder of Linguistic and Experiential Meaning. *J Neurosci*  
1184 **39**:8969–8987.  
1185 Andrews M, Frank S, Vigliocco G. 2014. Reconciling embodied and distributional accounts of  
1186 meaning in language. *Top Cogn Sci* **6**:359–370.  
1187 Barsalou LW. 2008. Grounded cognition. *Annu Rev Psychol* **59**:617–645.  
1188 Bates D, Mächler M, Bolker B, Walker S. 2015. Fitting Linear Mixed-Effects Models Using lme4.  
1189 *Journal of Statistical Software*. doi:10.18637/jss.v067.i01  
1190 Benjamini Y, Hochberg Y. 1995. Controlling the False Discovery Rate: A Practical and Powerful  
1191 Approach to Multiple Testing. *J R Stat Soc Series B Stat Methodol* **57**:289–300.  
1192 Binder JR, Desai RH. 2011. The neurobiology of semantic memory. *Trends Cogn Sci* **15**:527–  
1193 536.  
1194 Binder JR, Desai RH, Graves WW, Conant LL. 2009. Where is the semantic system? A critical  
1195 review and meta-analysis of 120 functional neuroimaging studies. *Cereb Cortex* **19**:2767–  
1196 2796.  
1197 Binder JR, Westbury CF, McKiernan KA, Possing ET, Medler DA. 2005. Distinct brain systems  
1198 for processing concrete and abstract concepts. *J Cogn Neurosci* **17**:905–917.  
1199 Boersma P, Weenink D. 2014. Praat: doing phonetics by computer.  
1200 Borghi AM, Binkofski F, Castelfranchi C, Cimatti F, Scrolli C, Tummolini L. 2017. The challenge  
1201 of abstract concepts. *Psychol Bull* **143**:263–292.  
1202 Bruni E, Tran N-K, Baroni M. 2014. Multimodal distributional semantics. *J Artif Intell Res* **49**:1–  
1203 47.  
1204 Brysbaert M, Warriner AB, Kuperman V. 2014. Concreteness ratings for 40 thousand generally  
1205 known English word lemmas. *Behav Res Methods* **46**:904–911.  
1206 Cadieu CF, Hong H, Yamins DLK, Pinto N, Ardila D, Solomon EA, Majaj NJ, DiCarlo JJ. 2014.  
1207 Deep neural networks rival the representation of primate IT cortex for core visual object  
1208 recognition. *PLoS Comput Biol* **10**:e1003963.  
1209 Chang EF, Edwards E, Nagarajan SS, Fogelson N, Dalal SS, Canolty RT, Kirsch HE, Barbaro  
1210 NM, Knight RT. 2011. Cortical spatio-temporal dynamics underlying phonological target  
1211 detection in humans. *J Cogn Neurosci* **23**:1437–1446.  
1212 Chatfield K, Simonyan K, Vedaldi A, Zisserman A. 2014. Return of the Devil in the Details:  
1213 Delving Deep into Convolutional Nets. *arXiv [csCV]*.  
1214 Chollet F, Others. 2015. Keras. <https://keras.io>  
1215 Collell G, Zhang T, Moens M-F. 2017. Imagined visual representations as multimodal  
1216 embeddingsThirty-First AAAI Conference on Artificial Intelligence.  
1217 Dale AM, Fischl B, Sereno MI. 1999. Cortical surface-based analysis. I. Segmentation and  
1218 surface reconstruction. *Neuroimage* **9**:179–194.  
1219 Deerwester S, Dumais ST, Furnas GW, Landauer TK, Harshman R. 1990. Indexing by latent  
1220 semantic analysis. *Journal of the American society for information science* **41**:391–407.

- 1221 de Heer WA, Huth AG, Griffiths TL, Gallant JL, Theunissen FE. 2017. The hierarchical cortical  
1222 organization of human speech processing. *Journal of Neuroscience* **37**:6539–6557.
- 1223 Deng J, Dong W, Socher R, Li L-J, Li K, Fei-Fei L. 2009. ImageNet: A large-scale hierarchical  
1224 image database 2009 IEEE Conference on Computer Vision and Pattern Recognition. IEEE.  
1225 pp. 248–255.
- 1226 Deniz F, Nunez-Elizalde AO, Huth AG, Gallant JL. 2019. The Representation of Semantic  
1227 Information Across Human Cerebral Cortex During Listening Versus Reading Is Invariant to  
1228 Stimulus Modality. *J Neurosci* **39**:7722–7736.
- 1229 Dove G. 2009. Beyond perceptual symbols: a call for representational pluralism. *Cognition*  
1230 **110**:412–431.
- 1231 Eickenberg M, Gramfort A, Varoquaux G, Thirion B. 2017. Seeing it all: Convolutional network  
1232 layers map the function of the human visual system. *Neuroimage* **152**:184–194.
- 1233 Gao JS, Huth AG, Lescroart MD, Gallant JL. 2015. Pycortex: an interactive surface visualizer for  
1234 fMRI. *Front Neuroinform* **9**:23.
- 1235 Glenberg AM, Robertson DA. 2000. Symbol grounding and meaning: A comparison of high-  
1236 dimensional and embodied theories of meaning. *J Mem Lang* **43**:379–401.
- 1237 Güçlü U, van Gerven MAJ. 2015. Deep neural networks reveal a gradient in the complexity of  
1238 neural representations across the ventral stream. *Journal of Neuroscience* **35**:10005–  
1239 10014.
- 1240 Hamilton LS, Huth AG. 2018. The revolution will not be controlled: natural stimuli in speech  
1241 neuroscience. *Language, Cognition and Neuroscience* 1–10.
- 1242 Harnad S. 1990. The symbol grounding problem. *Physica D*.
- 1243 Harpaintner M, Sim E-J, Trumpp NM, Ulrich M, Kiefer M. 2020. The grounding of abstract  
1244 concepts in the motor and visual system: An fMRI study. *Cortex* **124**:1–22.
- 1245 Harpaintner M, Trumpp NM, Kiefer M. 2018. The Semantic Content of Abstract Concepts: A  
1246 Property Listing Study of 296 Abstract Words. *Front Psychol* **9**:1748.
- 1247 Huth AG, de Heer WA, Griffiths TL, Theunissen FE, Gallant JL. 2016. Natural speech reveals  
1248 the semantic maps that tile human cerebral cortex. *Nature* **532**:453.
- 1249 Jain S, Huth A. 2018. Incorporating Context into Language Encoding Models for fMRI Advances  
1250 in Neural Information Processing Systems. pp. 6629–6638.
- 1251 Jones E, Oliphant T, Peterson P. 2001. SciPy: Open source scientific tools for Python.
- 1252 Khaligh-Razavi S-M, Kriegeskorte N. 2014. Deep supervised, but not unsupervised, models  
1253 may explain IT cortical representation. *PLoS Comput Biol* **10**:e1003915.
- 1254 Krizhevsky A, Sutskever I, Hinton GE. 2012. Imagenet classification with deep convolutional  
1255 neural networks Advances in Neural Information Processing Systems. pp. 1097–1105.
- 1256 Lund K, Burgess C. 1996. Producing high-dimensional semantic spaces from lexical co-  
1257 occurrence. *Behav Res Methods Instrum Comput* **28**:203–208.
- 1258 Lynott D, Connell L, Brysbaert M, Brand J, Carney J. 2020. The Lancaster Sensorimotor Norms:  
1259 multidimensional measures of perceptual and action strength for 40,000 English words.  
1260 *Behav Res Methods* **52**:1271–1291.
- 1261 Martin A. 2016. GRAPES—Grounding representations in action, perception, and emotion  
1262 systems: How object properties and categories are represented in the human brain.  
1263 *Psychon Bull Rev* **23**:979–990.
- 1264 Miller GA. 1995. WordNet: a lexical database for English. *Commun ACM* **38**:39–41.



- 1265 Mitchell TM, Shinkareva SV, Carlson A, Chang K-M, Malave VL, Mason RA, Just MA. 2008.  
1266 Predicting human brain activity associated with the meanings of nouns. *Science* **320**:1191–  
1267 1195.
- 1268 Nunez-Elizalde AO, Huth AG, Gallant JL. 2019. Voxelwise encoding models with non-spherical  
1269 multivariate normal priors. *Neuroimage* **197**:482–492.
- 1270 Oliphant TE. 2006. A guide to NumPy. Trelgol Publishing USA.
- 1271 Paivio A. 1991. Dual coding theory: Retrospect and current status. *Canadian Journal of*  
1272 *Psychology/Revue canadienne de psychologie* **45**:255–287.
- 1273 Pennington J, Socher R, Manning C. 2014. Glove: Global vectors for word  
1274 representation Proceedings of the 2014 Conference on Empirical Methods in Natural  
1275 Language Processing (EMNLP). pp. 1532–1543.
- 1276 Riordan B, Jones MN. 2011. Redundancy in perceptual and linguistic experience: Comparing  
1277 feature-based and distributional models of semantic representation. *Top Cogn Sci* **3**:303–  
1278 345.
- 1279 Saxe R, Kanwisher N. 2003. People thinking about thinking people The role of the tempo-  
1280 parietal junction in “theory of mind.” *NeuroImage*. doi:10.1016/s1053-8119(03)00230-1
- 1281 Sermanet P, Eigen D, Zhang X, Mathieu M, Fergus R, LeCun Y. 2013. OverFeat: Integrated  
1282 Recognition, Localization and Detection using Convolutional Networks. *arXiv [csCV]*.
- 1283 Simonyan K, Zisserman A. 2015. Very Deep Convolutional Networks for Large-Scale Image  
1284 Recognition International Conference on Learning Representations.
- 1285 Wehbe L, Murphy B, Talukdar P, Fyshe A, Ramdas A, Mitchell T. 2014. Simultaneously  
1286 uncovering the patterns of brain regions involved in different story reading subprocesses.  
1287 *PLoS One* **9**:e112575.
- 1288 Westfall J, Nichols TE, Yarkoni T. 2016. Fixing the stimulus-as-fixed-effect fallacy in task fMRI.  
1289 *Wellcome open research* **1**.
- 1290 Yamins DLK, Hong H, Cadieu CF, Solomon EA, Seibert D, DiCarlo JJ. 2014. Performance-  
1291 optimized hierarchical models predict neural responses in higher visual cortex. *Proc Natl*  
1292 *Acad Sci U S A* **111**:8619–8624.
- 1293 Yuan J, Liberman M. 2008. Speaker identification on the SCOTUS corpus. *J Acoust Soc Am*  
1294 **123**:3878.
- 1295 Zeiler MD, Fergus R. 2014. Visualizing and Understanding Convolutional Networks Computer  
1296 Vision – ECCV 2014. Springer International Publishing. pp. 818–833.

1297

## Supplemental Figures

1298

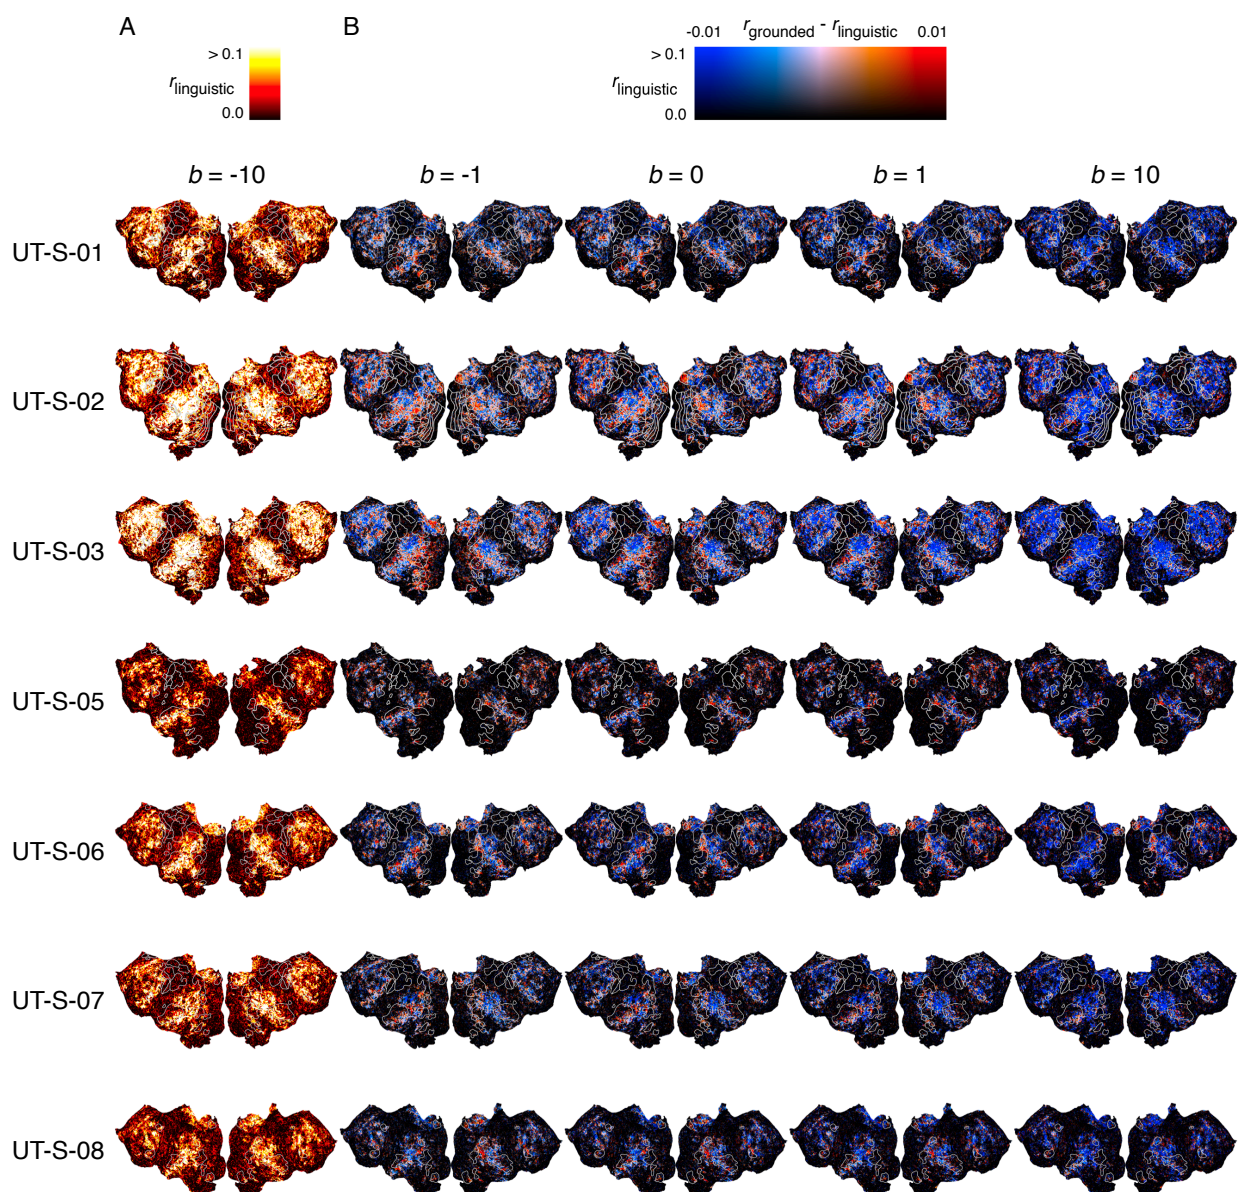

1299

1300

1301

1302

1303

1304

1305

1306

1307

**Figure S1 (related to Figure 3). Encoding model performance across semantic embedding spaces.** Encoding models were fit using each space in a semantic embedding spectrum ranging from fully linguistic to fully visual. Prediction performance for each voxel is measured by mean linear correlation  $r$  across 25 evaluation stories. **(A)** Cortical flatmaps show the prediction performance of the fully linguistic embedding space ( $b = -10$ ) for each voxel in each subject. Well-predicted voxels appear yellow or white, and poorly predicted voxels appear black. **(B)** Cortical flatmaps show the difference in prediction performance between each visually grounded embedding space and the fully linguistic embedding space. Voxels that are better predicted by each visually grounded space are colored red, and voxels that are better predicted by the fully linguistic space are colored blue. The brightness of each voxel is given by the performance of the fully linguistic space.

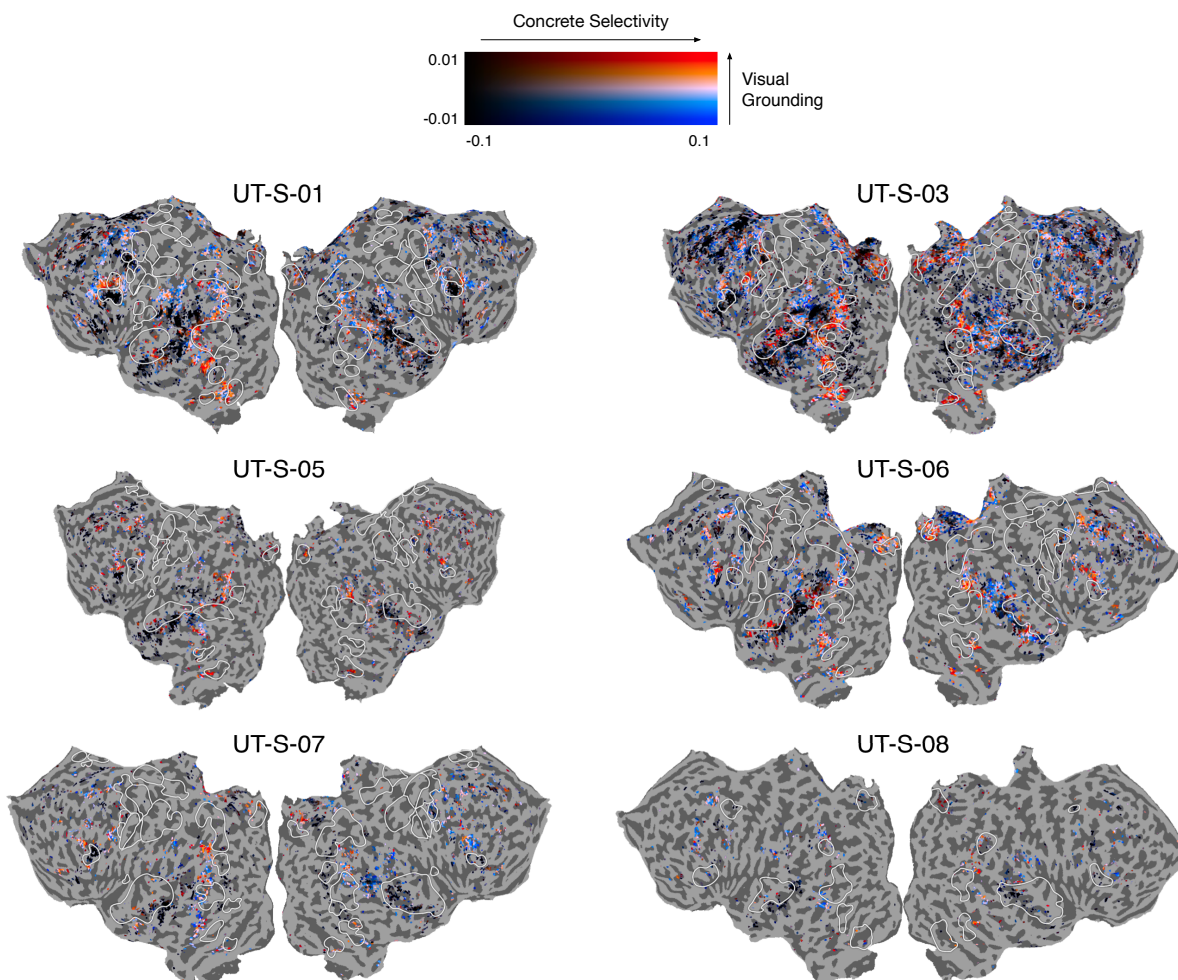

1308  
1309 **Figure S2 (related to Figure 5). Representational format of concrete concepts across cortex.** Similar to **Figure 5** in the main  
1310 text, a *concrete selectivity score* was computed for each voxel as the projection of its encoding weights onto the vector of  
1311 concreteness scores for each word, and a *visual grounding score* was computed for each voxel as the difference in model  
1312 performance between a visually grounded encoding model ( $b = -1$ ) and a fully linguistic encoding model. Cortical flatmaps show the  
1313 concrete selectivity score and visual grounding score for each voxel in subjects UT-S-01, UT-S-03, UT-S-05, UT-S-06, UT-S-07,  
1314 and UT-S-08. These maps show that across subjects, concrete selective voxels near the visual system are better modeled by the  
1315 visually grounded space, while concrete selective voxels near somatosensory and motor systems are better modeled by the  
1316 linguistic space.
